# Supplementary material for: Evolution of Minimal Specificity and Promiscuity in Steroid Hormone Receptors
Source: PLOS journal article supplement (doi:10.1371/journal.pgen.1003072), 2012-11-15
Supplement: S1 (10.1371/journal.pgen.1003072.s001) [file journal.pgen.1003072.s001.pdf › journal.pgen.1003072.s001.pdf]

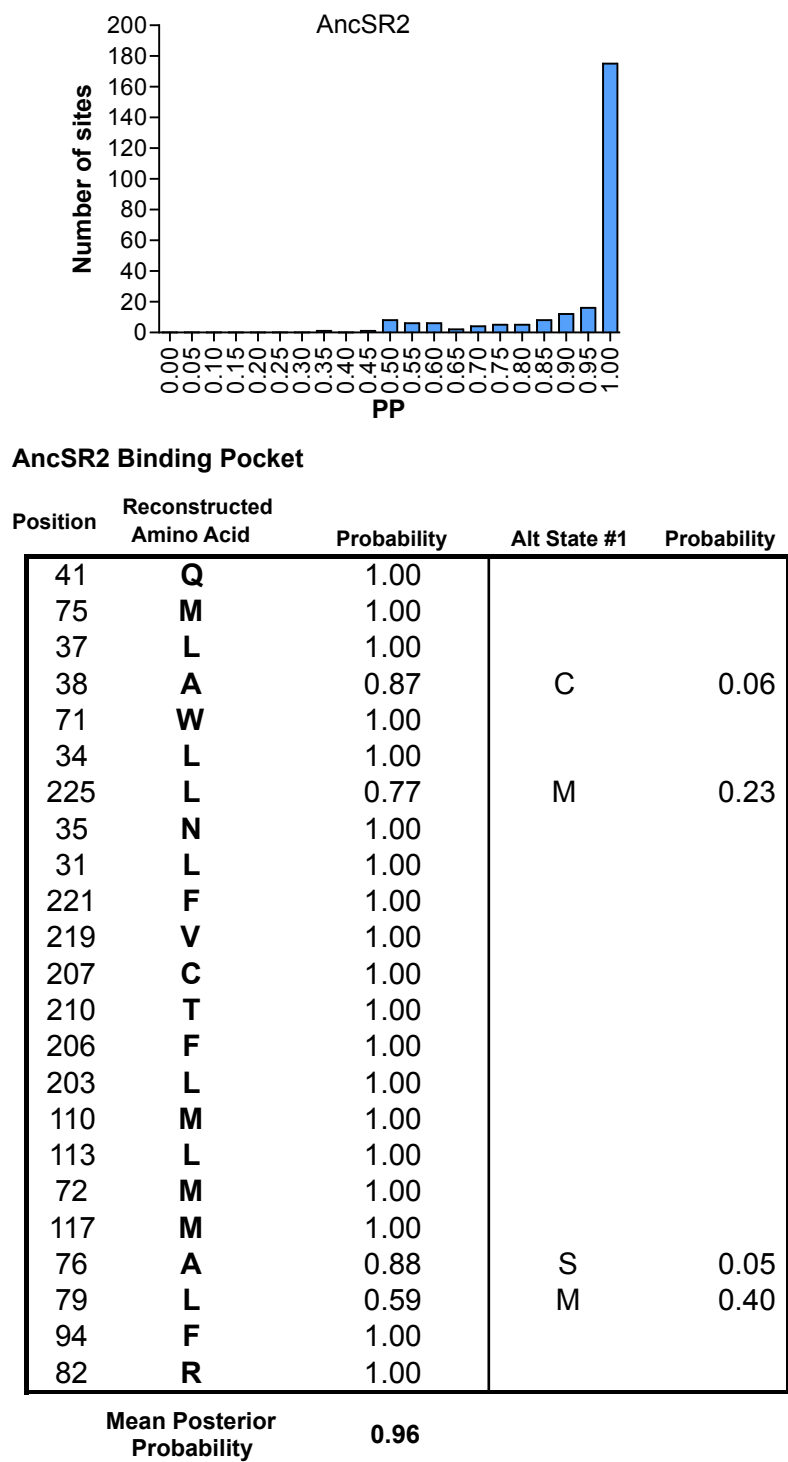

Fig. S1 Histogram of distribution of posterior probabilities for AncSR2 and posterior probabilities of amino acid residues lining the binding pocket.
