# Supplementary material for: Evolution of Minimal Specificity and Promiscuity in Steroid Hormone Receptors
Source: PLOS journal article supplement (doi:10.1371/journal.pgen.1003072), 2012-11-15
Supplement: S6 (10.1371/journal.pgen.1003072.s006) [file journal.pgen.1003072.s006.pdf › journal.pgen.1003072.s006.pdf]

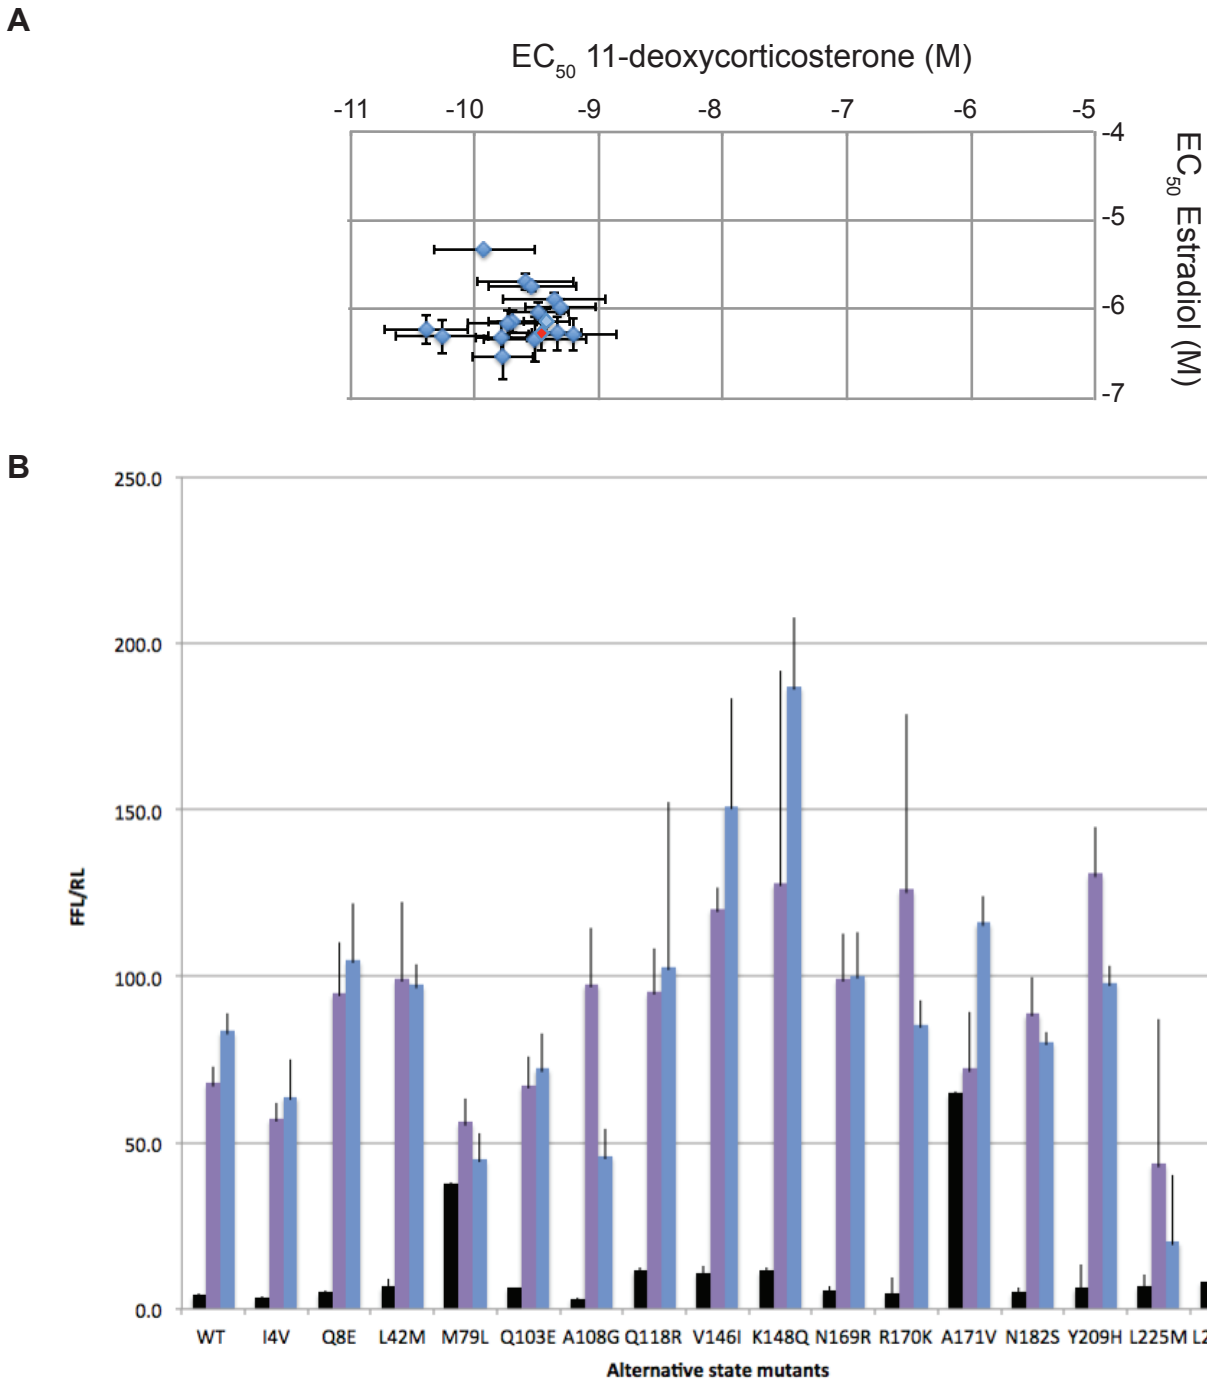

Fig. S6 **A**. Sensitivity of AncSR2 alternative state mutants to 11-deoxycorticosterone (11-DOC) and estradiol. The ML Met79 AncSR2 ancestor is indicated in red. **B**. Fold activation of the AncSR2 alternative state mutants by 1% ethanol (EtOH; vehicle control), 10 nM 11-DOC, and 10 nM progesterone (P4). The M79L and A171V AncSR2 mutants are constitutively active.
