# Supplementary material for: Evolution of Minimal Specificity and Promiscuity in Steroid Hormone Receptors
Source: PLOS journal article supplement (doi:10.1371/journal.pgen.1003072), 2012-11-15
Supplement: S7 (10.1371/journal.pgen.1003072.s007) [file journal.pgen.1003072.s007.pdf › journal.pgen.1003072.s007.pdf]

## Human MR

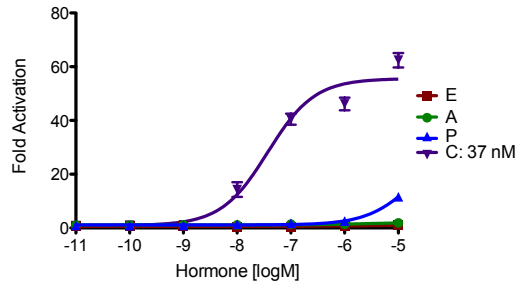

## Human GR

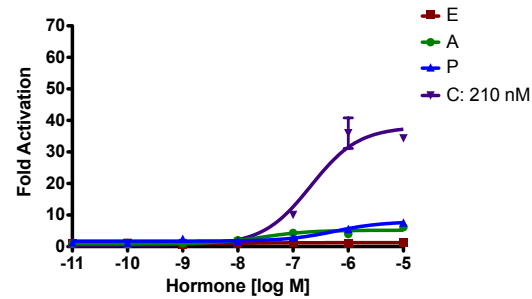

## Human AR

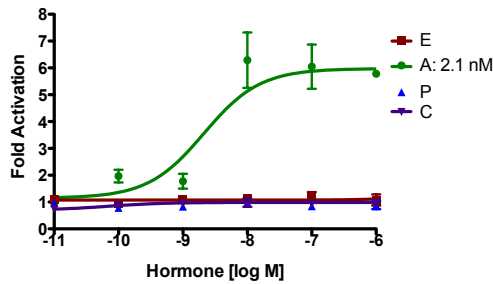

## Human PR

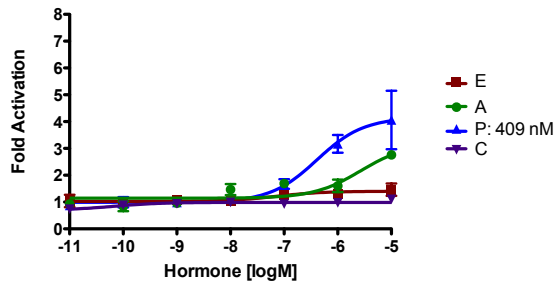

## Human ER $\alpha$

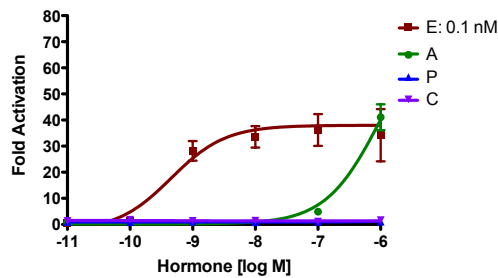

**Fig. S7.** Sensitivity of the ligand binding domains of the mineralocorticoid receptor (MR), glucocorticoid receptor (GR), androgen receptor (AR), progesterone receptor (PR), and human estrogen receptor alpha (hER $\alpha$ ) to a representative estrogen (E, estradiol), androgen (A, dihydrotestosterone), progestagen (P, progesterone), and corticosteroid (C, cortisol). Only EC<sub>50</sub> values < 1000 nM are indicated.
