# Supplementary material for: Evolution of Minimal Specificity and Promiscuity in Steroid Hormone Receptors
Source: PLOS journal article supplement (doi:10.1371/journal.pgen.1003072), 2012-11-15
Supplement: S9 (10.1371/journal.pgen.1003072.s009) [file journal.pgen.1003072.s009]

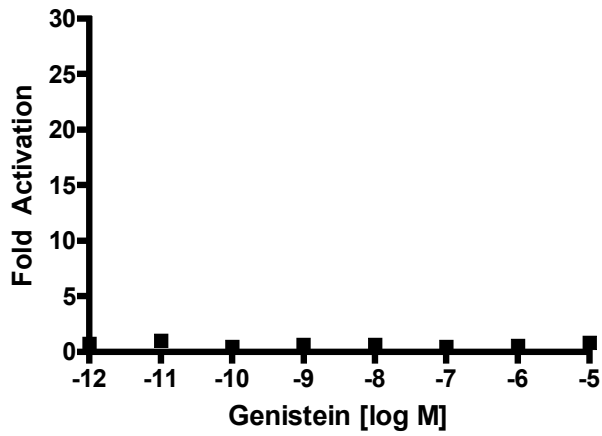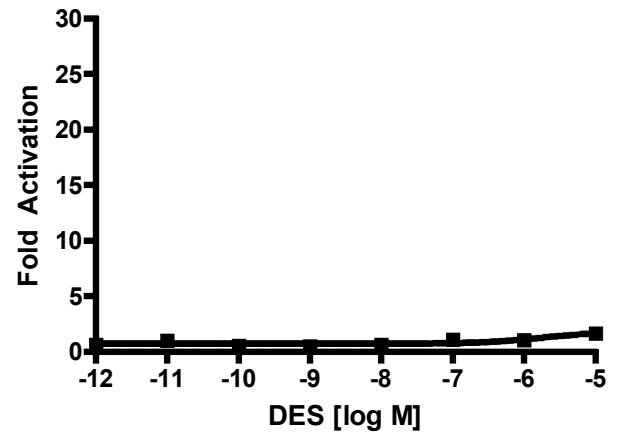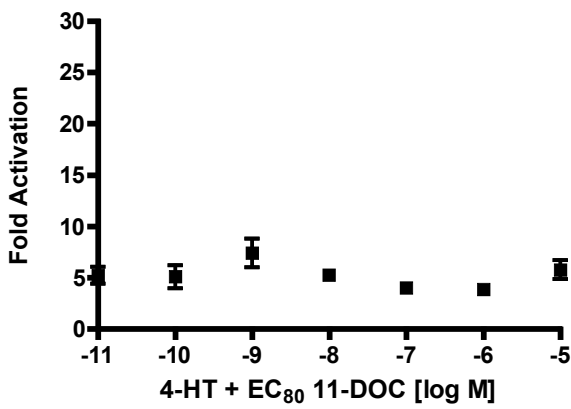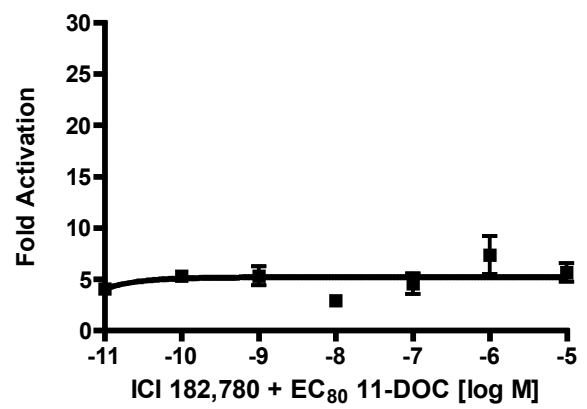

Fig. S9 AncSR2 is not activated by the nonsteroidal ER agonists diethylstilbestrol (DES) and genistein and is not inhibited by 4-hydroxytamoxifen (4-HT) or ICI1 82,780 in the presence of EC<sub>80</sub> 11-deoxycorticosterone (1.7 nM).
