# Supplementary material for: Evolution of Minimal Specificity and Promiscuity in Steroid Hormone Receptors
Source: PLOS journal article supplement (doi:10.1371/journal.pgen.1003072), 2012-11-15
Supplement: S11 (10.1371/journal.pgen.1003072.s011) [file journal.pgen.1003072.s011.pdf › journal.pgen.1003072.s011.pdf]

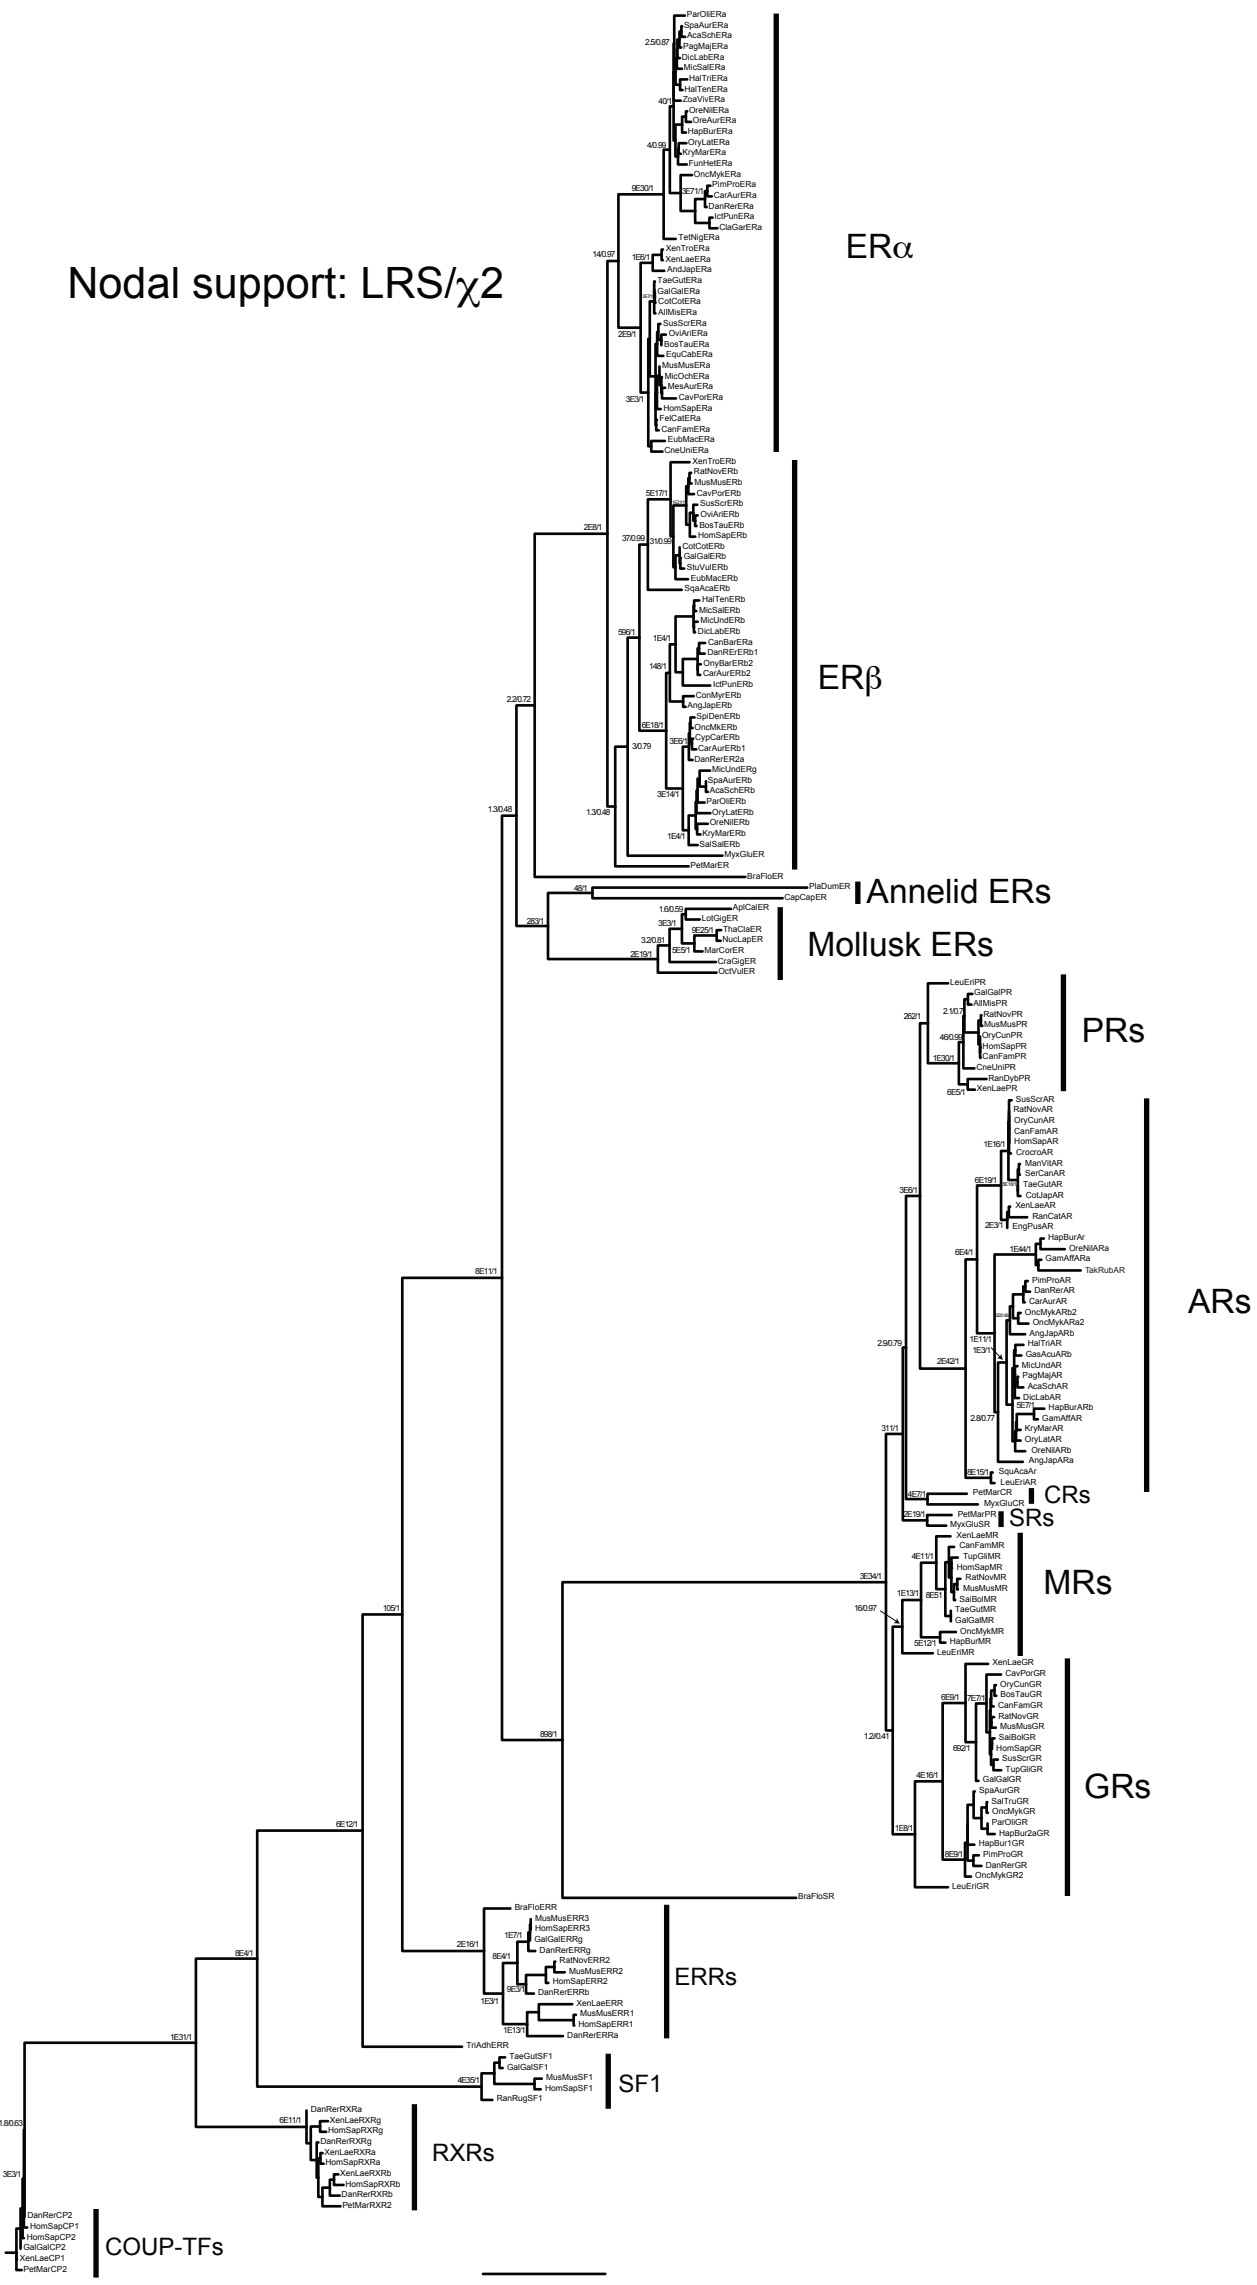

Fig. S11 Unreduced ML steroid receptor phylogeny based on alignment of 213 steroid receptors and related sequences used to reconstruct AncSR1. Nodal support is indicated by likelihood ratio statistics and chi-squared values. ERs, estrogen receptors; PRs, progesterone receptors; ARs, androgen receptors; MRs, mineralocorticoid receptors; GRs, glucocorticoid receptors; ERRs, estrogen-related receptors; SF1, steroidogenic factor 1 receptor; RXR, retinoid X receptors; COUP-TFs, chicken ovalbumin upstream promoter transcription factors.
