# Supplementary material for: Evolution of Minimal Specificity and Promiscuity in Steroid Hormone Receptors
Source: PLOS journal article supplement (doi:10.1371/journal.pgen.1003072), 2012-11-15
Supplement: S13 (10.1371/journal.pgen.1003072.s013) [file journal.pgen.1003072.s013.pdf › journal.pgen.1003072.s013.pdf]

**A**

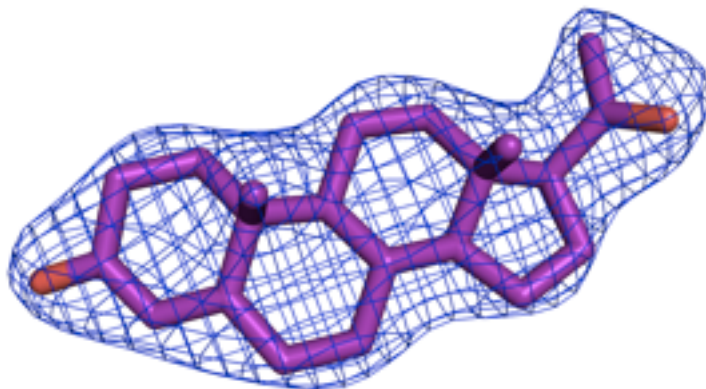

**B**

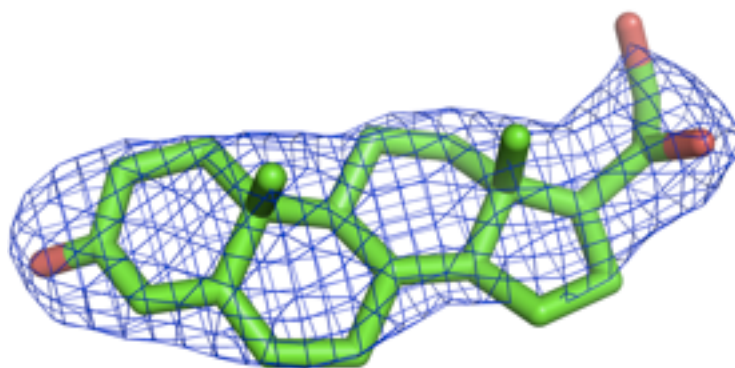

Fig. S13. Omit maps showing that progesterone and 11-deoxycorticosterone bind directly to AncSR2 to promote receptor activation. A.  $F_o - F_c$  omit electron Density (blue, contoured at  $1 \sigma$ ) for the bound progesterone (purple, oxygen - red). B.  $F_o - F_c$  omit electron density (blue, contoured at  $1 \sigma$ ) for the bound deoxycorticosterone (green, oxygen - red).
