# Supplementary material for: Evolution of Minimal Specificity and Promiscuity in Steroid Hormone Receptors
Source: PLOS journal article supplement (doi:10.1371/journal.pgen.1003072), 2012-11-15
Supplement: S14 (10.1371/journal.pgen.1003072.s014) [file journal.pgen.1003072.s014.pdf › journal.pgen.1003072.s014.pdf]

Table S1. The reconstructed sequence of AncSR2. Ambiguously reconstructed sites with a posterior probability (PP) > 0.2 (grey shading) were introduced into the ML ancestor and their responses to 11-deoxycorticosterone and estradiol evaluated using a luciferase reporter assay.

| AncSR2 reconstructed on 184-taxa ML tree |            |      |   |      |   |      |             |            |      |   |      |   |      |               |            |      |   |      |   |      |           |  |  |  |  |  |  |
|------------------------------------------|------------|------|---|------|---|------|-------------|------------|------|---|------|---|------|---------------|------------|------|---|------|---|------|-----------|--|--|--|--|--|--|
| Reconstructed                            |            |      |   |      |   |      | Alt state   |            |      |   |      |   |      | Reconstructed |            |      |   |      |   |      | Alt state |  |  |  |  |  |  |
| Residue No.                              | Amino Acid | PP   | 1 | PP   | 2 | PP   | Residue No. | Amino Acid | PP   | 1 | PP   | 2 | PP   | Residue No.   | Amino Acid | PP   | 1 | PP   | 2 | PP   |           |  |  |  |  |  |  |
| 1                                        | P          | 1.00 |   |      |   |      | 84          | Y          | 1.00 |   |      |   |      | 167           | E          | 1.00 |   |      |   |      |           |  |  |  |  |  |  |
| 2                                        | S          | 0.81 | T | 0.19 | P | 0.01 | 85          | K          | 0.99 | R | 0.01 | Q | 0.00 | 168           | L          | 1.00 |   |      |   |      |           |  |  |  |  |  |  |
| 3                                        | L          | 0.91 | I | 0.04 | M | 0.03 | 86          | H          | 1.00 |   |      |   |      | 169           | N          | 0.43 | R | 0.25 | G | 0.18 |           |  |  |  |  |  |  |
| 4                                        | I          | 0.78 | V | 0.21 | M | 0.00 | 87          | T          | 0.82 | A | 0.07 | V | 0.06 | 170           | R          | 0.66 | K | 0.34 | Q | 0.00 |           |  |  |  |  |  |  |
| 5                                        | S          | 0.94 | T | 0.05 | A | 0.01 | 88          | N          | 1.00 |   |      |   |      | 171           | A          | 0.68 | V | 0.31 | T | 0.01 |           |  |  |  |  |  |  |
| 6                                        | I          | 0.94 | V | 0.03 | L | 0.02 | 89          | G          | 1.00 | S | 0.00 |   |      | 172           | I          | 0.94 | V | 0.06 |   |      |           |  |  |  |  |  |  |
| 7                                        | L          | 1.00 |   |      |   |      | 90          | Q          | 0.76 | K | 0.13 | N | 0.04 | 173           | A          | 0.68 | V | 0.20 | G | 0.05 |           |  |  |  |  |  |  |
| 8                                        | Q          | 0.50 | E | 0.49 | K | 0.01 | 91          | M          | 1.00 | L | 0.00 |   |      | 174           | K          | 0.55 | R | 0.34 | Q | 0.06 |           |  |  |  |  |  |  |
| 9                                        | A          | 0.56 | V | 0.19 | S | 0.13 | 92          | L          | 1.00 |   |      |   |      | 175           | K          | 0.55 | R | 0.24 | Q | 0.14 |           |  |  |  |  |  |  |
| 10                                       | I          | 1.00 |   |      |   |      | 93          | Y          | 1.00 | F | 0.00 |   |      | 176           | E          | 0.98 | D | 0.02 | Q | 0.00 |           |  |  |  |  |  |  |
| 11                                       | E          | 1.00 |   |      |   |      | 94          | F          | 1.00 |   |      |   |      | 177           | N          | 0.85 | K | 0.08 | G | 0.04 |           |  |  |  |  |  |  |
| 12                                       | P          | 1.00 |   |      |   |      | 95          | A          | 1.00 |   |      |   |      | 178           | N          | 1.00 | S | 0.00 | D | 0.00 |           |  |  |  |  |  |  |
| 13                                       | E          | 0.99 | D | 0.01 |   |      | 96          | P          | 1.00 |   |      |   |      | 179           | S          | 0.53 | T | 0.24 | A | 0.16 |           |  |  |  |  |  |  |
| 14                                       | V          | 0.98 | I | 0.04 | M | 0.00 | 97          | D          | 1.00 |   |      |   |      | 180           | A          | 0.47 | G | 0.24 | S | 0.19 |           |  |  |  |  |  |  |
| 15                                       | V          | 0.98 | I | 0.02 | L | 0.00 | 98          | L          | 1.00 |   |      |   |      | 181           | Q          | 0.99 | E | 0.01 |   |      |           |  |  |  |  |  |  |
| 16                                       | Y          | 1.00 | F | 0.00 |   |      | 99          | I          | 0.98 | V | 0.02 |   |      | 182           | N          | 0.56 | S | 0.41 | G | 0.01 |           |  |  |  |  |  |  |
| 17                                       | A          | 1.00 |   |      |   |      | 100         | F          | 1.00 |   |      |   |      | 183           | W          | 1.00 |   |      |   |      |           |  |  |  |  |  |  |
| 18                                       | G          | 1.00 |   |      |   |      | 101         | N          | 1.00 |   |      |   |      | 184           | Q          | 1.00 | H | 0.00 |   |      |           |  |  |  |  |  |  |
| 19                                       | Y          | 1.00 | F | 0.00 |   |      | 102         | E          | 1.00 |   |      |   |      | 185           | R          | 1.00 |   |      |   |      |           |  |  |  |  |  |  |
| 20                                       | D          | 1.00 |   |      |   |      | 103         | Q          | 0.63 | E | 0.36 | D | 0.01 | 186           | F          | 1.00 |   |      |   |      |           |  |  |  |  |  |  |
| 21                                       | N          | 0.81 | S | 0.19 | T | 0.00 | 104         | R          | 1.00 |   |      |   |      | 187           | Y          | 1.00 |   |      |   |      |           |  |  |  |  |  |  |
| 22                                       | T          | 0.61 | S | 0.38 | A | 0.01 | 105         | M          | 1.00 |   |      |   |      | 188           | Q          | 1.00 |   |      |   |      |           |  |  |  |  |  |  |
| 23                                       | Q          | 0.97 | R | 0.02 | H | 0.00 | 106         | Q          | 0.99 | H | 0.00 | K | 0.00 | 189           | L          | 1.00 |   |      |   |      |           |  |  |  |  |  |  |
| 24                                       | P          | 1.00 |   |      |   |      | 107         | Q          | 1.00 |   |      |   |      | 190           | T          | 1.00 |   |      |   |      |           |  |  |  |  |  |  |
| 25                                       | D          | 0.95 | E | 0.04 | M | 0.00 | 108         | S          | 1.00 |   |      |   |      | 191           | K          | 1.00 |   |      |   |      |           |  |  |  |  |  |  |
| 26                                       | T          | 1.00 |   |      |   |      | 109         | A          | 1.00 | T | 0.00 | S | 0.00 | 192           | L          | 0.99 | M | 0.01 |   |      |           |  |  |  |  |  |  |
| 27                                       | T          | 0.99 | S | 0.01 | A | 0.00 | 110         | M          | 1.00 |   |      |   |      | 193           | L          | 1.00 |   |      |   |      |           |  |  |  |  |  |  |
| 28                                       | N          | 0.97 | S | 0.02 | D | 0.01 | 111         | Y          | 1.00 | F | 0.00 | H | 0.00 | 194           | D          | 1.00 |   |      |   |      |           |  |  |  |  |  |  |
| 29                                       | Y          | 0.80 | H | 0.19 | R | 0.01 | 112         | D          | 0.73 | E | 0.27 | N | 0.00 | 195           | S          | 1.00 |   |      |   |      |           |  |  |  |  |  |  |
| 30                                       | L          | 1.00 | M | 0.00 |   |      | 113         | L          | 1.00 |   |      |   |      | 196           | M          | 1.00 |   |      |   |      |           |  |  |  |  |  |  |
| 31                                       | L          | 1.00 |   |      |   |      | 114         | C          | 1.00 |   |      |   |      | 197           | H          | 1.00 |   |      |   |      |           |  |  |  |  |  |  |
| 32                                       | S          | 0.90 | T | 0.10 | A | 0.00 | 115         | Q          | 0.48 | L | 0.18 | M | 0.09 | 198           | D          | 0.97 | E | 0.03 |   |      |           |  |  |  |  |  |  |
| 33                                       | S          | 1.00 | T | 0.00 |   |      | 116         | G          | 1.00 |   |      |   |      | 199           | L          | 1.00 | M | 0.00 |   |      |           |  |  |  |  |  |  |
| 34                                       | L          | 1.00 |   |      |   |      | 117         | M          | 1.00 |   |      |   |      | 200           | V          | 1.00 |   |      | S | 0.00 |           |  |  |  |  |  |  |
| 35                                       | N          | 1.00 |   |      |   |      | 118         | Q          | 0.48 | R | 0.48 | H | 0.02 | 201           | G          | 1.00 | E | 0.00 | N | 0.00 |           |  |  |  |  |  |  |
| 36                                       | R          | 0.99 | K | 0.01 | Q | 0.00 | 119         | Q          | 0.99 | K | 0.01 | N | 0.00 | 202           | G          | 0.93 | K | 0.05 |   |      |           |  |  |  |  |  |  |
| 37                                       | L          | 1.00 |   |      |   |      | 120         | I          | 1.00 | V | 0.00 |   |      | 203           | L          | 1.00 |   |      |   |      |           |  |  |  |  |  |  |
| 38                                       | A          | 0.87 | C | 0.06 | G | 0.05 | 121         | S          | 0.99 | A | 0.01 | T | 0.00 | 204           | L          | 1.00 |   |      |   |      |           |  |  |  |  |  |  |
| 39                                       | E          | 0.85 | G | 0.13 | D | 0.02 | 122         | Q          | 0.47 | L | 0.11 | K | 0.09 | 205           | Q          | 0.99 | E | 0.01 |   |      |           |  |  |  |  |  |  |
| 40                                       | K          | 0.61 | R | 0.40 |   |      | 123         | E          | 1.00 | D | 0.00 |   |      | 206           | F          | 1.00 |   |      |   |      |           |  |  |  |  |  |  |
| 41                                       | Q          | 1.00 |   |      |   |      | 124         | F          | 1.00 |   |      |   |      | 207           | C          | 1.00 |   |      |   |      |           |  |  |  |  |  |  |
| 42                                       | L          | 0.77 | M | 0.23 |   |      | 125         | V          | 0.87 | I | 0.07 | M | 0.03 | 208           | F          | 1.00 |   |      |   |      |           |  |  |  |  |  |  |
| 43                                       | V          | 1.00 | I | 0.00 |   |      | 126         | R          | 0.98 | K | 0.02 | H | 0.00 | 209           | Y          | 0.60 | H | 0.30 | N | 0.07 |           |  |  |  |  |  |  |
| 44                                       | S          | 0.92 | R | 0.05 | P | 0.02 | 127         | L          | 1.00 |   |      |   |      | 210           | T          | 1.00 |   |      |   |      |           |  |  |  |  |  |  |
| 45                                       | V          | 1.00 | I | 0.00 |   |      | 128         | Q          | 1.00 |   |      |   |      | 211           | F          | 1.00 |   |      |   |      |           |  |  |  |  |  |  |
| 46                                       | V          | 1.00 |   |      |   |      | 129         | V          | 0.97 | L | 0.03 | I | 0.01 | 212           | V          | 0.99 | I | 0.01 | M | 0.01 |           |  |  |  |  |  |  |
| 47                                       | K          | 1.00 | R | 0.00 |   |      | 130         | T          | 0.98 | S | 0.02 | A | 0.00 | 213           | Q          | 0.90 | E | 0.10 |   |      |           |  |  |  |  |  |  |
| 48                                       | W          | 1.00 |   |      |   |      | 131         | Q          | 0.53 | H | 0.28 | Y | 0.17 | 214           | S          | 1.00 | N | 0.00 |   |      |           |  |  |  |  |  |  |
| 49                                       | A          | 1.00 |   |      |   |      | 132         | E          | 1.00 | D | 0.01 |   |      | 215           | Q          | 0.82 | K | 0.17 | R | 0.01 |           |  |  |  |  |  |  |
| 50                                       | K          | 1.00 |   |      |   |      | 133         | E          | 1.00 |   |      |   |      | 216           | A          | 0.95 | T | 0.03 | S | 0.01 |           |  |  |  |  |  |  |
| 51                                       | A          | 0.88 | V | 0.08 | S | 0.04 | 134         | F          | 0.99 | Y | 0.01 |   |      | 217           | L          | 1.00 | M | 0.00 |   |      |           |  |  |  |  |  |  |
| 52                                       | L          | 1.00 | M | 0.00 |   |      | 135         | L          | 1.00 |   |      |   |      | 218           | S          | 0.96 | K | 0.01 | N | 0.01 |           |  |  |  |  |  |  |
| 53                                       | P          | 1.00 |   |      |   |      | 136         | C          | 1.00 |   |      |   |      | 219           | V          | 1.00 |   |      |   |      |           |  |  |  |  |  |  |
| 54                                       | G          | 1.00 |   |      |   |      | 137         | M          | 1.00 |   |      |   |      | 220           | E          | 1.00 |   |      |   |      |           |  |  |  |  |  |  |
| 55                                       | F          | 1.00 |   |      |   |      | 138         | K          | 1.00 |   |      |   |      | 221           | F          | 1.00 |   |      |   |      |           |  |  |  |  |  |  |
| 56                                       | R          | 1.00 | K | 0.00 |   |      | 139         | A          | 0.87 | V | 0.13 |   |      | 222           | P          | 1.00 |   |      |   |      |           |  |  |  |  |  |  |
| 57                                       | N          | 0.99 | S | 0.01 | D | 0.00 | 140         | L          | 0.98 | I | 0.02 | M | 0.00 | 223           | E          | 1.00 | D | 0.00 |   |      |           |  |  |  |  |  |  |
| 58                                       | L          | 1.00 |   |      |   |      | 141         | L          | 1.00 |   |      |   |      | 224           | M          | 1.00 |   |      |   |      |           |  |  |  |  |  |  |
| 59                                       | H          | 0.98 | P | 0.01 | Q | 0.01 | 142         | L          | 1.00 |   |      |   |      | 225           | L          | 0.77 | M | 0.23 | I | 0.00 |           |  |  |  |  |  |  |
| 60                                       | L          | 0.79 | I | 0.21 | M | 0.00 | 143         | L          | 1.00 |   |      |   |      | 226           | V          | 0.63 | S | 0.18 | A | 0.14 |           |  |  |  |  |  |  |
| 61                                       | D          | 0.99 | E | 0.01 | N | 0.00 | 144         | S          | 0.99 | N | 0.01 | G | 0.00 | 227           | E          | 1.00 |   |      |   |      |           |  |  |  |  |  |  |
| 62                                       | D          | 1.00 |   |      |   |      | 145         | T          | 1.00 |   |      |   |      | 228           | I          | 1.00 | M | 0.00 |   |      |           |  |  |  |  |  |  |
| 63                                       | Q          | 1.00 |   |      |   |      | 146         | V          | 0.67 | I | 0.33 |   |      | 229           | I          | 1.00 |   |      |   |      |           |  |  |  |  |  |  |
| 64                                       | M          | 1.00 |   |      |   |      | 147         | P          | 1.00 |   |      |   |      | 230           | S          | 1.00 | N | 0.00 | T | 0.00 |           |  |  |  |  |  |  |
| 65                                       | T          | 1.00 |   |      |   |      | 148         | K          | 0.61 | Q | 0.34 | R | 0.04 | 231           | A          | 0.90 | D | 0.07 | N | 0.03 |           |  |  |  |  |  |  |
| 66                                       | L          | 1.00 |   |      |   |      | 149         | E          | 0.54 | D | 0.46 | N | 0.00 | 232           | Q          | 1.00 |   |      |   |      |           |  |  |  |  |  |  |
| 67                                       | I          | 0.52 | L | 0.48 | M | 0.00 | 150         | G          | 1.00 |   |      |   |      | 233           | L          | 1.00 | M | 0.00 | F | 0.00 |           |  |  |  |  |  |  |
| 68                                       | Q          | 1.00 |   |      |   |      | 151         | L          | 1.00 |   |      |   |      | 234           | P          | 1.00 |   |      |   |      |           |  |  |  |  |  |  |
| 69                                       | Y          | 1.00 |   |      |   |      | 152         | K          | 1.00 | R | 0.00 |   |      | 235           | K          | 0.95 | R | 0.05 | Q | 0.00 |           |  |  |  |  |  |  |
| 70                                       | S          | 1.00 |   |      |   |      | 153         | S          | 1.00 | T | 0.00 | N | 0.00 | 236           | V          | 0.86 | I | 0.14 | M | 0.00 |           |  |  |  |  |  |  |
| 71                                       | W          | 1.00 |   |      |   |      | 154         | Q          | 1.00 | H | 0.00 |   |      | 237           | L          | 0.49 | M | 0.22 | T | 0.14 |           |  |  |  |  |  |  |
| 72                                       | M          | 1.00 |   |      |   |      | 155         | A          | 0.83 | T | 0.13 | S | 0.04 | 238           | A          | 0.92 | S | 0.05 | T | 0.03 |           |  |  |  |  |  |  |
| 73                                       | G          | 0.75 | S | 0.14 | C | 0.10 | 156         | S          | 0.34 | Y | 0.17 | A | 0.15 | 239           | G          | 1.00 |   |      |   |      |           |  |  |  |  |  |  |
| 74                                       | L          | 1.00 |   |      |   |      | 157         | F          | 1.00 |   |      |   |      | 240           | M          | 0.97 | L | 0.01 | I | 0.01 |           |  |  |  |  |  |  |
| 75                                       | M          | 1.00 |   |      |   |      | 158         | D          | 0.95 | E | 0.05 | N | 0.00 | 241           | A          | 0.96 | T | 0.03 | V | 0.00 |           |  |  |  |  |  |  |
| 76                                       | A          | 0.88 | S | 0.05 | T | 0.03 | 159         | E          | 1.00 | D | 0.00 | Q | 0.00 | 242           | K          | 1.00 | R | 0.00 |   |      |           |  |  |  |  |  |  |
| 77                                       | F          | 1.00 |   |      |   |      | 160         | M          | 0.99 | I | 0.01 | L | 0.00 | 243           | P          | 1.00 | S | 0.00 |   |      |           |  |  |  |  |  |  |
| 78                                       | A          | 0.84 | S | 0.15 | G | 0.00 | 161         | R          | 1.00 |   |      |   |      | 244           | L          | 1.00 |   |      |   |      |           |  |  |  |  |  |  |
| 79                                       | L          | 0.59 | M | 0.41 | I | 0.00 | 162         | M          | 1.00 | I | 0.00 | L | 0.00 | 245           | L          | 0.99 | F | 0.00 | M | 0.00 |           |  |  |  |  |  |  |
| 80                                       | Q          | 0.92 | S | 0.07 | A | 0.02 | 163         | N          | 0.98 | S | 0.02 | D | 0.00 | 246           | F          | 1.00 |   |      |   |      |           |  |  |  |  |  |  |
| 81                                       | W          | 1.00 |   |      |   |      | 164         | Y          | 1.00 |   |      |   |      | 247           | H          | 1.00 |   |      |   |      |           |  |  |  |  |  |  |
| 82                                       | R          | 1.00 |   |      |   |      | 165         | I          | 1.00 |   |      |   |      | 248           | K          | 0.91 | R | 0.07 | Q | 0.02 |           |  |  |  |  |  |  |
| 83                                       | S          | 1.00 |   |      |   |      | 166         | K          | 0.68 | R | 0.32 | Q | 0.00 | 249           | K          | 1.00 | R | 0.00 |   |      |           |  |  |  |  |  |  |

Mean

Posterior Probability

0.93
