# Supplementary material for: Evolution of Minimal Specificity and Promiscuity in Steroid Hormone Receptors
Source: PLOS journal article supplement (doi:10.1371/journal.pgen.1003072), 2012-11-15
Supplement: S15 (10.1371/journal.pgen.1003072.s015) [file journal.pgen.1003072.s015.pdf › journal.pgen.1003072.s015.pdf]

Table S2. The reconstructed sequence of AncSR1 and associated posterior probability (PP) values.

| AncSR1 reconstructed on 213-taxon gene duplication tree |                          |        |             |      |             |      |             |                          |      |             |      |             |      |             |                          |      |             |      |             |      |
|---------------------------------------------------------|--------------------------|--------|-------------|------|-------------|------|-------------|--------------------------|------|-------------|------|-------------|------|-------------|--------------------------|------|-------------|------|-------------|------|
| Residue No.                                             | Reconstructed Amino Acid | PP     | Alt state 1 | PP   | Alt state 2 | PP   | Residue No. | Reconstructed Amino Acid | PP   | Alt state 1 | PP   | Alt state 2 | PP   | Residue No. | Reconstructed Amino Acid | PP   | Alt state 1 | PP   | Alt state 2 | PP   |
| 1                                                       | E                        | 0.14   | K           | 0.13 | R           | 0.09 | 84          | L                        | 1.00 |             |      |             |      | 167         | E                        | 0.94 | D           | 0.04 | Q           | 0.01 |
| 2                                                       | K                        | 0.17   | R           | 0.14 | S           | 0.10 | 85          | I                        | 0.50 | M           | 0.46 | V           | 0.04 | 168         | D                        | 0.69 | N           | 0.17 | E           | 0.07 |
| 3                                                       | P                        | 0.21   | S           | 0.12 | A           | 0.10 | 86          | L                        | 0.70 | I           | 0.22 | V           | 0.05 | 169         | H                        | 0.16 | Y           | 0.12 | F           | 0.10 |
| 4                                                       | L                        | 0.12   | P           | 0.11 | A           | 0.10 | 87          | G                        | 1.00 | D           | 0.00 |             |      | 170         | E                        | 0.21 | D           | 0.19 | G           | 0.08 |
| 5                                                       | S                        | 0.12   | K           | 0.09 | A           | 0.09 | 88          | L                        | 0.99 | M           | 0.01 | V           | 0.00 | 171         | Q                        | 0.38 | K           | 0.34 | R           | 0.19 |
| 6                                                       | S                        | 0.13   | A           | 0.09 | K           | 0.08 | 89          | A                        | 0.68 | V           | 0.29 | I           | 0.02 | 172         | V                        | 0.63 | I           | 0.36 | M           | 0.00 |
| 7                                                       | L                        | 0.16   | S           | 0.09 | A           | 0.08 | 90          | W                        | 1.00 |             |      |             |      | 173         | Q                        | 0.70 | E           | 0.15 | H           | 0.09 |
| 8                                                       | P                        | 0.31   | S           | 0.26 | T           | 0.15 | 91          | R                        | 1.00 |             |      |             |      | 174         | K                        | 0.31 | Q           | 0.23 | E           | 0.16 |
| 9                                                       | A                        | 0.38   | S           | 0.15 | T           | 0.13 | 92          | S                        | 1.00 |             |      |             |      | 175         | L                        | 0.54 | I           | 0.27 | M           | 0.17 |
| 10                                                      | N                        | 0.22   | E           | 0.16 | K           | 0.12 | 93          | M                        | 0.83 | I           | 0.12 | L           | 0.04 | 176         | Q                        | 0.99 | R           | 0.01 | H           | 0.00 |
| 11                                                      | Q                        | 0.28   | S           | 0.15 | P           | 0.11 | 94          | D                        | 0.42 | E           | 0.37 | Q           | 0.06 | 177         | D                        | 0.61 | E           | 0.26 | Q           | 0.09 |
| 12                                                      | L                        | 0.45   | I           | 0.30 | V           | 0.16 | 95          | H                        | 0.98 | Y           | 0.02 |             |      | 178         | K                        | 0.19 | N           | 0.18 | T           | 0.15 |
| 13                                                      | I                        | 0.62   | V           | 0.32 | L           | 0.03 | 96          | E                        | 0.36 | K           | 0.21 | Q           | 0.14 | 179         | I                        | 0.83 | V           | 0.11 | L           | 0.06 |
| 14                                                      | S                        | 0.40   | N           | 0.14 | A           | 0.13 | 97          | G                        | 0.97 | D           | 0.02 | N           | 0.01 | 180         | T                        | 0.42 | H           | 0.33 | N           | 0.07 |
| 15                                                      | A                        | 0.57   | S           | 0.09 | T           | 0.07 | 98          | K                        | 0.80 | E           | 0.08 | R           | 0.07 | 181         | D                        | 0.78 | E           | 0.22 | N           | 0.00 |
| 16                                                      | L                        | 1.00   |             |      |             |      | 99          | L                        | 1.00 | M           | 0.00 |             |      | 182         | A                        | 1.00 |             |      |             |      |
| 17                                                      | L                        | 0.67   | M           | 0.13 | Q           | 0.05 | 100         | V                        | 0.50 | I           | 0.39 | L           | 0.05 | 183         | V                        | 1.00 |             |      |             |      |
| 18                                                      | A                        | 0.47   | K           | 0.16 | Q           | 0.07 | 101         | F                        | 1.00 |             |      |             |      | 184         | V                        | 0.30 | I           | 0.12 | Q           | 0.10 |
| 19                                                      | A                        | 0.99   | V           | 0.01 | T           | 0.00 | 102         | A                        | 1.00 |             |      |             |      | 185         | D                        | 0.68 | E           | 0.16 | H           | 0.08 |
| 20                                                      | E                        | 1.00   |             |      |             |      | 103         | P                        | 1.00 | S           | 0.00 | A           | 0.00 | 186         | T                        | 0.43 | A           | 0.18 | S           | 0.15 |
| 21                                                      | P                        | 1.00   |             |      |             |      | 104         | D                        | 1.00 | N           | 0.00 |             |      | 187         | V                        | 0.30 | C           | 0.25 | T           | 0.16 |
| 22                                                      | P                        | 0.94   | S           | 0.02 | Q           | 0.01 | 105         | L                        | 0.99 | M           | 0.01 | F           | 0.00 | 188         | A                        | 0.54 | S           | 0.18 | T           | 0.08 |
| 23                                                      | V                        | 0.29   | I           | 0.28 | T           | 0.10 | 106         | I                        | 0.61 | V           | 0.25 | L           | 0.08 | 189         | K                        | 0.62 | R           | 0.25 | Q           | 0.04 |
| 24                                                      | L                        | 0.51   | V           | 0.21 | I           | 0.14 | 107         | L                        | 0.73 | M           | 0.20 | F           | 0.04 | 190         | S                        | 0.29 | R           | 0.11 | N           | 0.10 |
| 25                                                      | Y                        | 0.79   | H           | 0.15 | F           | 0.01 | 108         | D                        | 1.00 | N           | 0.00 | E           | 0.00 | 191         | H                        | 0.84 | Y           | 0.06 | Q           | 0.05 |
| 26                                                      | S                        | 0.49   | A           | 0.44 | T           | 0.06 | 109         | R                        | 0.91 | K           | 0.06 | Q           | 0.02 | 192         | P                        | 0.26 | L           | 0.13 | S           | 0.09 |
| 27                                                      | R                        | 0.16   | Q           | 0.14 | H           | 0.11 | 110         | E                        | 0.29 | D           | 0.21 | N           | 0.16 | 193         | D                        | 0.26 | E           | 0.25 | N           | 0.14 |
| 28                                                      | H                        | 0.97   | Y           | 0.03 | Q           | 0.00 | 111         | Q                        | 0.69 | R           | 0.23 | H           | 0.04 | 194         | S                        | 0.35 | N           | 0.20 | P           | 0.17 |
| 29                                                      | D                        | 0.99   | N           | 0.01 | E           | 0.00 | 112         | S                        | 0.82 | G           | 0.07 | A           | 0.05 | 195         | P                        | 0.98 | S           | 0.01 | A           | 0.00 |
| 30                                                      | P                        | 0.99   | S           | 0.00 | H           | 0.00 | 113         | K                        | 0.59 | R           | 0.37 | Q           | 0.02 | 196         | Q                        | 0.51 | E           | 0.16 | R           | 0.09 |
| 31                                                      | S                        | 0.13   | A           | 0.09 | D           | 0.09 | 114         | C                        | 0.68 | S           | 0.09 | A           | 0.05 | 197         | Q                        | 0.50 | R           | 0.08 | K           | 0.07 |
| 32                                                      | K                        | 0.12   | L           | 0.12 | R           | 0.11 | 115         | V                        | 0.59 | I           | 0.17 | A           | 0.12 | 198         | S                        | 0.48 | P           | 0.12 | A           | 0.08 |
| 33                                                      | P                        | 1.00   |             |      |             |      | 116         | A                        | 0.91 | S           | 0.07 | T           | 0.02 | 199         | R                        | 0.87 | K           | 0.08 | Q           | 0.02 |
| 34                                                      | D                        | 0.16   | P           | 0.16 | S           | 0.15 | 117         | Q                        | 1.00 |             |      |             |      | 200         | R                        | 1.00 |             |      |             |      |
| 35                                                      | T                        | 0.98   | S           | 0.02 | A           | 0.00 | 118         | M                        | 0.98 | L           | 0.02 | I           | 0.00 | 201         | L                        | 0.67 | F           | 0.13 | I           | 0.11 |
| 36                                                      | E                        | 0.75   | D           | 0.17 | K           | 0.03 | 119         | E                        | 0.22 | D           | 0.15 | A           | 0.13 | 202         | A                        | 0.98 | S           | 0.01 | G           | 0.00 |
| 37                                                      | A                        | 0.48   | V           | 0.14 | S           | 0.10 | 120         | E                        | 0.82 | D           | 0.17 | Q           | 0.01 | 203         | Q                        | 0.76 | K           | 0.20 | R           | 0.03 |
| 38                                                      | H                        | 0.36   | N           | 0.22 | S           | 0.13 | 121         | I                        | 0.99 | L           | 0.00 | V           | 0.00 | 204         | L                        | 0.98 | M           | 0.01 | I           | 0.01 |
| 39                                                      | L                        | 0.50   | M           | 0.37 | I           | 0.07 | 122         | C                        | 0.74 | S           | 0.17 | F           | 0.06 | 205         | L                        | 1.00 | M           | 0.00 |             |      |
| 40                                                      | M                        | 0.62   | L           | 0.27 | I           | 0.10 | 123         | D                        | 0.42 | E           | 0.30 | N           | 0.06 | 206         | M                        | 0.51 | L           | 0.48 | I           | 0.00 |
| 41                                                      | T                        | 0.88   | A           | 0.06 | S           | 0.03 | 124         | Q                        | 0.79 | H           | 0.13 | P           | 0.03 | 207         | L                        | 0.86 | I           | 0.07 | M           | 0.05 |
| 42                                                      | S                        | 0.81   | T           | 0.18 | A           | 0.01 | 125         | I                        | 0.79 | V           | 0.16 | M           | 0.04 | 208         | L                        | 1.00 | M           | 0.00 |             |      |
| 43                                                      | L                        | 0.99   | I           | 0.00 | V           | 0.00 | 126         | L                        | 0.91 | M           | 0.03 | F           | 0.02 | 209         | S                        | 0.77 | P           | 0.23 | T           | 0.00 |
| 44                                                      | T                        | 0.97   | S           | 0.02 | I           | 0.00 | 127         | E                        | 0.35 | A           | 0.30 | Q           | 0.14 | 210         | H                        | 0.87 | Q           | 0.11 | E           | 0.00 |
| 45                                                      | N                        | 0.37   | D           | 0.29 | E           | 0.14 | 128         | I                        | 0.46 | L           | 0.24 | V           | 0.19 | 211         | I                        | 0.68 | V           | 0.23 | L           | 0.07 |
| 46                                                      | L                        | 1.00   |             |      |             |      | 129         | A                        | 0.87 | S           | 0.09 | T           | 0.02 | 212         | R                        | 1.00 |             |      |             |      |
| 47                                                      | A                        | 1.00   |             |      |             |      | 130         | S                        | 0.17 | Q           | 0.17 | R           | 0.15 | 213         | V                        | 0.98 | H           | 0.01 | E           | 0.01 |
| 48                                                      | D                        | 1.00   | E           | 0.00 | N           | 0.00 | 131         | Q                        | 0.56 | R           | 0.22 | K           | 0.22 | 214         | V                        | 0.59 | I           | 0.27 | M           | 0.07 |
| 49                                                      | R                        | 0.98   | K           | 0.02 |             |      | 132         | F                        | 1.00 | Y           | 0.00 |             |      | 215         | S                        | 0.98 | A           | 0.02 | T           | 0.00 |
| 50                                                      | E                        | 1.00   |             |      |             |      | 133         | R                        | 0.61 | K           | 0.19 | Q           | 0.04 | 216         | S                        | 0.27 | N           | 0.26 | T           | 0.21 |
| 51                                                      | L                        | 1.00   |             |      |             |      | 134         | E                        | 0.59 | Q           | 0.15 | D           | 0.12 | 217         | K                        | 0.57 | R           | 0.42 | Q           | 0.01 |
| 52                                                      | V                        | 0.99   | I           | 0.01 |             |      | 135         | L                        | 0.98 | F           | 0.02 | I           | 0.00 | 218         | G                        | 0.88 | A           | 0.11 | S           | 0.01 |
| 53                                                      | H                        | 0.33   | G           | 0.12 | D           | 0.12 | 136         | K                        | 0.37 | Q           | 0.20 | R           | 0.16 | 219         | I                        | 0.76 | V           | 0.17 | M           | 0.06 |
| 54                                                      | I                        | 0.52   | V           | 0.36 | M           | 0.09 | 137         | V                        | 0.43 | L           | 0.25 | I           | 0.24 | 220         | E                        | 0.78 | D           | 0.13 | Q           | 0.06 |
| 55                                                      | I                        | 0.99   | V           | 0.01 |             |      | 138         | Q                        | 0.37 | N           | 0.15 | E           | 0.12 | 221         | H                        | 1.00 | Y           | 0.00 |             |      |
| 56                                                      | N                        | 0.68   | D           | 0.20 | S           | 0.05 | 139         | K                        | 0.53 | R           | 0.44 | Q           | 0.03 | 222         | L                        | 0.97 | F           | 0.03 | I           | 0.00 |
| 57                                                      | W                        | 1.00   |             |      |             |      | 140         | E                        | 0.96 | D           | 0.03 | Q           | 0.01 | 223         | Y                        | 0.91 | F           | 0.08 | H           | 0.01 |
| 58                                                      | A                        | 1.00   |             |      |             |      | 141         | E                        | 1.00 |             |      |             |      | 224         | S                        | 0.49 | N           | 0.18 | K           | 0.07 |
| 59                                                      | K                        | 1.00   |             |      |             |      | 142         | F                        | 0.93 | Y           | 0.07 |             |      | 225         | M                        | 0.47 | I           | 0.44 | V           | 0.05 |
| 60                                                      | K                        | 0.39   | R           | 0.36 | H           | 0.15 | 143         | V                        | 0.95 | I           | 0.02 | L           | 0.02 | 226         | K                        | 0.96 | R           | 0.04 | Q           | 0.00 |
| 61                                                      | I                        | 0.96   | V           | 0.03 | L           | 0.01 | 144         | C                        | 1.00 |             |      |             |      | 227         | S                        | 0.37 | C           | 0.15 | N           | 0.10 |
| 62                                                      | P                        | 1.00   |             |      |             |      | 145         | L                        | 1.00 |             |      |             |      | 228         | E                        | 0.78 | A           | 0.07 | Q           | 0.07 |
| 63                                                      | G                        | 1.00   |             |      |             |      | 146         | K                        | 1.00 | R           | 0.00 |             |      | 229         | R                        | 0.69 | N           | 0.15 | S           | 0.11 |
| 64                                                      | Y                        | 0.64   | F           | 0.36 |             |      | 147         | A                        | 1.00 |             |      |             |      | 230         | G                        | 0.20 | K           | 0.18 | A           | 0.13 |
| 65                                                      | S                        | 0.82   | T           | 0.12 | A           | 0.04 | 148         | I                        | 0.94 | M           | 0.03 | V           | 0.02 | 231         | V                        | 1.00 |             |      |             |      |
| 66                                                      | D                        | 0.48   | E           | 0.28 | N           | 0.12 | 149         | T                        | 0.61 | A           | 0.18 | V           | 0.11 | 232         | P                        | 1.00 | S           | 0.00 |             |      |
| 67                                                      | L                        | 1.00   |             |      |             |      | 150         | L                        | 1.00 |             |      |             |      | 233         | L                        | 0.84 | M           | 0.10 | F           | 0.03 |
| 68                                                      | S                        | 0.86   | P           | 0.04 | A           | 0.03 | 151         | L                        | 0.45 | V           | 0.43 | I           | 0.10 | 234         | Y                        | 0.70 | H           | 0.26 | C           | 0.01 |
| 69                                                      | L                        | 0.99   | M           | 0.01 | I           | 0.00 | 152         | N                        | 1.00 | S           | 0.00 |             |      | 235         | D                        | 0.96 | N           | 0.02 | E           | 0.02 |
| 70                                                      | N                        | 0.64   | H           | 0.09 | D           | 0.08 | 153         | S                        | 0.55 | A           | 0.38 | G           | 0.04 | 236         | L                        | 1.00 |             |      |             |      |
| 71                                                      | D                        | 1.00   |             |      |             |      | 154         | G                        | 0.57 | S           | 0.08 | A           | 0.06 | 237         | L                        | 1.00 | M           | 0.00 |             |      |
| 72                                                      | Q                        | 1.00   |             |      |             |      | 155         | V                        | 0.33 | I           | 0.15 | L           | 0.15 | 238         | L                        | 0.84 | S           | 0.04 | M           | 0.04 |
| 73                                                      | V                        | 1.00   | M           | 0.00 |             |      | 156         | F                        | 0.34 | Y           | 0.20 | C           | 0.12 | 239         | E                        | 1.00 |             |      |             |      |
| 74                                                      | H                        | 0.63   | N           | 0.14 | S           | 0.08 | 157         | T                        | 0.31 | S           | 0.14 | A           | 0.11 | 240         | M                        | 1.00 | I           | 0.00 | V           | 0.00 |
| 75                                                      | L                        | 1.00   |             |      |             |      | 158         | F                        | 0.27 | S           | 0.18 | L           | 0.12 | 241         | L                        | 1.00 | I           | 0.00 |             |      |
| 76                                                      | L                        | 0.95   | I           | 0.05 | M           | 0.00 | 159         | L                        | 0.30 | S           | 0.13 | M           | 0.06 | 242         | D                        | 0.82 | E           | 0.18 | N           | 0.00 |
| 77                                                      | Q                        | 0.87   | E           | 0.13 | R           | 0.00 | 160         | S                        | 0.42 | N           | 0.11 | A           | 0.09 | 243         | A                        | 1.00 |             |      |             |      |
| 78                                                      | S                        | 0.61   | C           | 0.35 | A           | 0.02 | 161         | S                        | 0.43 | A           | 0.24 | T           | 0.15 | 244         | Q                        | 0.89 | H           | 0.09 | K           | 0.01 |
| 79                                                      | C                        | 0.60   | S           | 0.31 | A           | 0.06 | 162         | D                        | 0.25 | A           | 0.25 | E           | 0.19 | 245         | T                        | 0.35 | S           | 0.11 | N           | 0.10 |
| 80                                                      | W                        | 1.00   |             |      |             |      | 163         | A                        | 0.23 | V           | 0.22 | S           | 0.16 | 246         | S                        | 0.41 | P           | 0.37 | A           | 0.06 |
| 81                                                      | M                        | 0.77   | L           | 0.23 | I           | 0.00 | 164         | K                        | 0.32 | E           | 0.32 | R           | 0.16 | 247         | Q                        | 0.20 | H           | 0.14 | A           | 0.13 |
| 82                                                      | E                        | 0.98</ |             |      |             |      |             |                          |      |             |      |             |      |             |                          |      |             |      |             |      |
