# Supplementary material for: Evolution of Minimal Specificity and Promiscuity in Steroid Hormone Receptors
Source: PLOS journal article supplement (doi:10.1371/journal.pgen.1003072), 2012-11-15
Supplement: S16 (10.1371/journal.pgen.1003072.s016) [file journal.pgen.1003072.s016.pdf › journal.pgen.1003072.s016.pdf]

Table S3. Percent similarity of the ligand-binding domains of AncSR1 and AncSR2 to those of extant steroid receptors in humans.

|               | <b>AncSR1</b> | <b>AncSR2</b> |
|---------------|---------------|---------------|
| <b>AncSR1</b> | 100%          |               |
| hER $\alpha$  | 61.80%        | 24.80%        |
| hER $\beta$   | 56.70%        | 25.70%        |
| hAR           | 25.60%        | 62.60%        |
| hPR           | 29.80%        | 66.50%        |
| hGR           | 29.80%        | 64.80%        |
| hMR           | 29%           | 71.70%        |
| <b>AncSR2</b> | 30.70%        | 100%          |
