# Supplementary material for: Evolution of Minimal Specificity and Promiscuity in Steroid Hormone Receptors
Source: PLOS journal article supplement (doi:10.1371/journal.pgen.1003072), 2012-11-15
Supplement: S20 (10.1371/journal.pgen.1003072.s020) [file journal.pgen.1003072.s020.pdf › journal.pgen.1003072.s020.pdf]

Table S7. List of receptors and the organisms they were isolated from used in the phylogenetic analyses. Receptors shaded in grey are those that were additionally incorporated into the phylogeny used to reconstruct AncSR1. ERs, estrogen receptors; PRs, progesterone receptors; ARs, androgen receptors; MRs, mineralocorticoid receptors; GRs, glucocorticoid receptors; ERRs, estrogen-related receptors; SF1, steroidogenic factor 1 receptor; RXR, retinoid X receptors; COUP-TFs, chicken ovalbumin upstream promoter transcription factors.

|                                   |                          |                              |                                                                                        |                                                                                                                            |                                                                              |                                                                                                                                                      |
|-----------------------------------|--------------------------|------------------------------|----------------------------------------------------------------------------------------|----------------------------------------------------------------------------------------------------------------------------|------------------------------------------------------------------------------|------------------------------------------------------------------------------------------------------------------------------------------------------|
| <i>Acanthopagrus schlegelii</i>   | black porgy              | Vertebrata, Teleostei        | AR<br>ER <sub>α</sub>                                                                  | AcaSchAR<br>AcaSchER <sub>α</sub>                                                                                          | Q80057<br>Q80406                                                             | UniPROTbK/tEMBL<br>UniPROTbK/tEMBL                                                                                                                   |
| <i>Alligator mississippiensis</i> | American alligator       | Vertebrata, Crocodylidae     | ER <sub>β</sub>                                                                        | AclMSchER <sub>β</sub>                                                                                                     | Q80407                                                                       | UniPROTbK/tEMBL                                                                                                                                      |
| <i>Anguilla japonica</i>          | Japanese eel             | Vertebrata, Teleostei        | AR <sub>α</sub><br>AR <sub>β</sub>                                                     | AngJapAR <sub>α</sub><br>AngJapAR <sub>β</sub>                                                                             | Q9VG9V<br>Q9PWG5                                                             | UniPROTbK/tEMBL<br>UniPROTbK/tEMBL                                                                                                                   |
| <i>Aplysia californica</i>        | sea slug                 | Mollusca, Gastropoda         | ER <sub>α</sub>                                                                        | AngJapER <sub>α</sub>                                                                                                      | Q13012                                                                       | UniPROTbK/tEMBL                                                                                                                                      |
| <i>Bos taurus</i>                 | cow                      | Vertebrata, Cetartiodactyla  | ER <sub>α</sub><br>ER <sub>β</sub><br>GR                                               | BoCauER <sub>α</sub><br>BoSTauER <sub>β</sub><br>BoSTauGR                                                                  | Q13012<br>Q8XS85<br>Q865V6                                                   | UniPROTbK/tEMBL<br>UniPROTbK/tEMBL<br>UniPROTbK/tEMBL                                                                                                |
| <i>Branchiostoma floridae</i>     | amphioxus                | Vertebrata, Cephalochordata  | ER <sub>α</sub>                                                                        | BrAFloER <sub>α</sub>                                                                                                      | B5L586                                                                       | UniPROTbK/tEMBL                                                                                                                                      |
| <i>Capitella capitata</i>         | bristle worm             | Annelida, Polychaeta         | ERR<br>SR                                                                              | BrAFloER <sub>α</sub><br>CapCapER                                                                                          | B6X120<br>B5SVV7                                                             | UniPROTbK/tEMBL<br>UniPROTbK/tEMBL                                                                                                                   |
| <i>Candidia barbatus</i>          | Taiwanese cyprinid fish  | Vertebrata, Teleostei        | ER <sub>α</sub>                                                                        | CanBarER <sub>α</sub>                                                                                                      | Q73135                                                                       | UniPROTbK/tEMBL                                                                                                                                      |
| <i>Canis familiaris</i>           | dog                      | Vertebrata, Carnivora        | AR<br>ER <sub>α</sub><br>GR<br>MR<br>PR                                                | CanFamAR<br>CanFamER <sub>α</sub><br>CanFamGR<br>CanFamMR<br>CanFamPR                                                      | P01190<br>AAS20260<br>Q3HTT7<br>Q3HT19<br>Q9GLW0                             | UniPROTbK/tEMBL<br>Genbank<br>UniPROTbK/tEMBL<br>UniPROTbK/tEMBL<br>UniPROTbK/tEMBL                                                                  |
| <i>Carassius auratus</i>          | goldfish                 | Vertebrata, Teleostei        | AR<br>ER <sub>α</sub><br>ER <sub>β</sub>                                               | CarAurAR<br>CarAurER <sub>α</sub><br>CarAurER <sub>β</sub>                                                                 | Q8QFV2<br>Q8QWV1<br>Q9VW69                                                   | UniPROTbK/tEMBL<br>UniPROTbK/tEMBL<br>UniPROTbK/tEMBL                                                                                                |
| <i>Cavia porcellus</i>            | guinea pig               | Vertebrata, Euarchontoglires | ER <sub>α</sub>                                                                        | CarPorER <sub>α</sub>                                                                                                      | Q9JAL9                                                                       | UniPROTbK/tEMBL                                                                                                                                      |
| <i>Clinarias garipeus</i>         | African catfish          | Vertebrata, Teleostei        | ER <sub>α</sub>                                                                        | CavPorER <sub>α</sub>                                                                                                      | Q8CGK9                                                                       | UniPROTbK/tEMBL                                                                                                                                      |
| <i>Cnemidophorus uniparens</i>    | whip-tailed lizard       | Vertebrata, Squamata         | ER <sub>α</sub>                                                                        | CalGarER <sub>α</sub>                                                                                                      | Q9OWH6                                                                       | UniPROTbK/tEMBL                                                                                                                                      |
| <i>Conger myxisternus</i>         | conger eel               | Vertebrata, Teleostei        | ER <sub>α</sub>                                                                        | CneUniER <sub>α</sub>                                                                                                      | Q8UWAA                                                                       | UniPROTbK/tEMBL                                                                                                                                      |
| <i>Cottus cottus</i>              | common quail             | Vertebrata, Aves             | ER <sub>α</sub>                                                                        | CneUniPR<br>CotMyER <sub>α</sub>                                                                                           | Q91425<br>Q762D6                                                             | UniPROTbK/tEMBL<br>UniPROTbK/tEMBL                                                                                                                   |
| <i>Crossarchia japonica</i>       | Asian quail              | Vertebrata, Aves             | ER <sub>α</sub>                                                                        | CoCoER <sub>α</sub>                                                                                                        | Q8AH40                                                                       | UniPROTbK/tEMBL                                                                                                                                      |
| <i>Crossostrea gigas</i>          | Pacific oyster           | Mollusca, Bivalvia           | ER <sub>α</sub>                                                                        | CoCoER <sub>β</sub>                                                                                                        | Q83511                                                                       | UniPROTbK/tEMBL                                                                                                                                      |
| <i>Crocota crocata</i>            | hyaena                   | Vertebrata, Carnivora        | AR                                                                                     | CoJagAR                                                                                                                    | Q689V8                                                                       | UniPROTbK/tEMBL                                                                                                                                      |
| <i>Cyprinus carpio</i>            | common carp              | Vertebrata, Teleostei        | ER <sub>α</sub>                                                                        | ColGigER                                                                                                                   | AZ2413                                                                       | UniPROTbK/tEMBL                                                                                                                                      |
| <i>Danio rerio</i>                | zebrafish                | Vertebrata, Teleostei        | AR<br>COUP-TFII                                                                        | CroCroAR<br>CypCarER <sub>β</sub>                                                                                          | Q8MIK0<br>Q8JJB9                                                             | UniPROTbK/tEMBL<br>UniPROTbK/tEMBL                                                                                                                   |
|                                   |                          |                              | ERR <sub>α</sub>                                                                       | DanRerER <sub>α</sub>                                                                                                      | Q8JALS                                                                       | UniPROTbK/tEMBL                                                                                                                                      |
|                                   |                          |                              | ERR <sub>β</sub>                                                                       | DanRerER <sub>β</sub>                                                                                                      | Q72U32                                                                       | UniPROTbK/tEMBL                                                                                                                                      |
|                                   |                          |                              | ERR <sub>γ</sub>                                                                       | DanRerER <sub>γ</sub>                                                                                                      | Q90W59                                                                       | UniPROTbK/tEMBL                                                                                                                                      |
|                                   |                          |                              | ERR <sub>δ</sub>                                                                       | DanRerER <sub>δ</sub>                                                                                                      | Q8Q6F6                                                                       | UniPROTbK/tEMBL                                                                                                                                      |
|                                   |                          |                              | ERR <sub>ε</sub>                                                                       | DanRerER <sub>ε</sub>                                                                                                      | Q6Q6F5                                                                       | UniPROTbK/tEMBL                                                                                                                                      |
|                                   |                          |                              | ERR <sub>ζ</sub>                                                                       | DanRerER <sub>ζ</sub>                                                                                                      | Q6Q6F4                                                                       | UniPROTbK/tEMBL                                                                                                                                      |
|                                   |                          |                              | ERR <sub>η</sub>                                                                       | DanRerER <sub>η</sub>                                                                                                      | Q1XHK0                                                                       | UniPROTbK/tEMBL                                                                                                                                      |
|                                   |                          |                              | ERR <sub>θ</sub>                                                                       | DanRerER <sub>θ</sub>                                                                                                      | Q90416                                                                       | UniPROTbK/tEMBL                                                                                                                                      |
|                                   |                          |                              | ERR <sub>ι</sub>                                                                       | DanRerER <sub>ι</sub>                                                                                                      | Q8JAL5                                                                       | UniPROTbK/tEMBL                                                                                                                                      |
|                                   |                          |                              | ERR <sub>κ</sub>                                                                       | DanRerER <sub>κ</sub>                                                                                                      | Q6Q6H9                                                                       | UniPROTbK/tEMBL                                                                                                                                      |
| <i>Dicentrarchus labrax</i>       | European sea bass        | Vertebrata, Teleostei        | AR<br>ER <sub>α</sub><br>ER <sub>β</sub>                                               | DicLabAR<br>DicLabER <sub>α</sub><br>DicLabER <sub>β</sub>                                                                 | Q64497<br>Q8A4C2<br>Q8KF57                                                   | UniPROTbK/tEMBL<br>UniPROTbK/tEMBL<br>UniPROTbK/tEMBL                                                                                                |
| <i>Enrystomops pustulosus</i>     | Lepodactylid frog        | Vertebrata, Anura            | AR                                                                                     | EngPusAR                                                                                                                   | Q2PK04                                                                       | UniPROTbK/tEMBL                                                                                                                                      |
| <i>Equus caballus</i>             | horse                    | Vertebrata, Perissodactyla   | ER <sub>α</sub>                                                                        | EquCabER <sub>α</sub>                                                                                                      | Q9T198                                                                       | UniPROTbK/tEMBL                                                                                                                                      |
| <i>Eublepharis macularius</i>     | leopard gecko            | Vertebrata, Squamata         | ER <sub>α</sub><br>ER <sub>β</sub>                                                     | EubMacER <sub>α</sub><br>EubMacER <sub>β</sub>                                                                             | Q2HWK5<br>Q2HWK4                                                             | UniPROTbK/tEMBL<br>UniPROTbK/tEMBL                                                                                                                   |
| <i>Felis catus</i>                | cat                      | Vertebrata, Carnivora        | ER <sub>α</sub>                                                                        | FeCatER <sub>α</sub>                                                                                                       | Q53AD2                                                                       | UniPROTbK/tEMBL                                                                                                                                      |
| <i>Fundulus heteroclitus</i>      | killifish                | Vertebrata, Teleostei        | AR                                                                                     | FunHetAR                                                                                                                   | Q73216                                                                       | UniPROTbK/tEMBL                                                                                                                                      |
| <i>Gallus gallus</i>              | chicken                  | Vertebrata, Aves             | COUP-TFII<br>ER <sub>α</sub><br>ER <sub>β</sub><br>ERR <sub>α</sub><br>MR<br>PR<br>SF1 | GalGalCP2<br>GalGalER <sub>α</sub><br>GalGalER <sub>β</sub><br>GalGalERR <sub>α</sub><br>GalGalMR<br>GalGalPR<br>GalGalSF1 | Q90733<br>P06212<br>Q9PTU5<br>Q5UKY7<br>Q3J9X7<br>C1KB94<br>P07812<br>Q9PW17 | UniPROTbK/tEMBL<br>UniPROTbK/tEMBL<br>UniPROTbK/tEMBL<br>UniPROTbK/tEMBL<br>UniPROTbK/tEMBL<br>UniPROTbK/tEMBL<br>UniPROTbK/tEMBL<br>UniPROTbK/tEMBL |
| <i>Gambusia affinis</i>           | western mosquitofish     | Vertebrata, Teleostei        | AR<br>AR <sub>α</sub>                                                                  | GamAfAR<br>GamAfAR <sub>α</sub>                                                                                            | Q60132<br>Q60GT9                                                             | UniPROTbK/tEMBL<br>UniPROTbK/tEMBL                                                                                                                   |
| <i>Gasterosteus aculeatus</i>     | three-spined stickleback | Vertebrata, Teleostei        | AR <sub>β</sub>                                                                        | GasAcuAR <sub>β</sub>                                                                                                      | Q80122                                                                       | UniPROTbK/tEMBL                                                                                                                                      |
| <i>Halichoeres tenuispinis</i>    | wrasse                   | Vertebrata, Teleostei        | ER <sub>α</sub><br>ER <sub>β</sub>                                                     | HalTenAR<br>HalTenER <sub>β</sub>                                                                                          | Q772K8<br>Q772K7                                                             | UniPROTbK/tEMBL<br>UniPROTbK/tEMBL                                                                                                                   |
| <i>Halichoeres trimaculatus</i>   | protogynous wrasse       | Vertebrata, Teleostei        | AR                                                                                     | HalTriAR                                                                                                                   | Q9DDJ4                                                                       | UniPROTbK/tEMBL                                                                                                                                      |

|                                 |                          |                            |           |             |                     |                  |
|---------------------------------|--------------------------|----------------------------|-----------|-------------|---------------------|------------------|
| <i>Lottia gigantea</i>          | limpet                   | Mollusca, Gastropoda       | ER        | LotGigER    | Lotgi1132166        | JGI              |
| <i>Manacus vitellinus</i>       | gold-collared manakin    | Vertebrata, Aves           | ER        | ManVIER     | Q4U102              | UniProtKB/TrEMBL |
| <i>Marisa cornuarietis</i>      | apple snail              | Mollusca, Gastropoda       | ER        | MarCorER    | Q06422              | UniProtKB/TrEMBL |
| <i>Mesocricetus auratus</i>     | golden hamster           | Vertebrata, Rodentia       | ER        | MCrAUR      | Q05475              | UniProtKB/TrEMBL |
| <i>Microtus ochrogaster</i>     | prairie vole             | Vertebrata, Rodentia       | ER        | MCrOChER    | Q1EDB6              | UniProtKB/TrEMBL |
| <i>Micropterus salmoides</i>    | largemouth bass          | Vertebrata, Teleostei      | ER        | MicSalERa   | Q9D242              | UniProtKB/TrEMBL |
|                                 |                          |                            | ER        | MicSalERb   | Q6XSH2              | UniProtKB/TrEMBL |
| <i>Micropogonias undulatus</i>  | Atlantic croaker         | Vertebrata, Teleostei      | AR        | MicUndAR    | Q66VR6              | UniProtKB/TrEMBL |
|                                 |                          |                            | ER        | MicUndERb   | P57781              | UniProtKB/TrEMBL |
|                                 |                          |                            | ER        | McUndERg    | P57783              | UniProtKB/TrEMBL |
| <i>Mus musculus</i>             | mouse                    | Vertebrata, Rodentia       | ER        | MusMusERa   | P19785              | UniProtKB/TrEMBL |
|                                 |                          |                            | ER        | MusMusERb   | Q08537              | UniProtKB/TrEMBL |
|                                 |                          |                            | ER        | MusMusERR1  | Q08580              | UniProtKB/TrEMBL |
|                                 |                          |                            | ER        | MusMusERR2  | P61539              | UniProtKB/TrEMBL |
|                                 |                          |                            | ER        | MusMusERR3  | P62509              | UniProtKB/TrEMBL |
|                                 |                          |                            | GR        | MusMusGR    | P06537              | UniProtKB/TrEMBL |
|                                 |                          |                            | MR        | MusMusMR    | Q8V18               | UniProtKB/TrEMBL |
|                                 |                          |                            | PR        | MusMusPR    | Q00175              | UniProtKB/TrEMBL |
|                                 |                          |                            | SF1       | MusMusSF1   | P33242              | UniProtKB/TrEMBL |
| <i>Myxine glutinosa</i>         | Atlantic hagfish         | Vertebrata, Teleostei      | CR        | MyxGLUCR    | Q1KX96              | UniProtKB/TrEMBL |
|                                 |                          |                            | ER        | MyxGLUER    | EU439936            | Genbank          |
|                                 |                          |                            | SR        | MyxGLUSR    | Q1KX95              | UniProtKB/TrEMBL |
| <i>Nucella lapillus</i>         | Atlantic dogwinkle       | Mollusca, Gastropoda       | ER        | NucLapER    | AS1Y35              | UniProtKB/TrEMBL |
| <i>Octopus vulgaris</i>         | octopus                  | Mollusca, Cephalopoda      | ER        | OctVulER    | Q19440              | UniProtKB/TrEMBL |
| <i>Oncorhynchus mykiss</i>      | rainbow trout            | Vertebrata, Teleostei      | AR        | OnoMykARa2  | Q93244              | UniProtKB/TrEMBL |
|                                 |                          |                            | AR        | OnoMykARb2  | Q93245              | UniProtKB/TrEMBL |
|                                 |                          |                            | ER        | OnoMykERa   | P16058              | UniProtKB/TrEMBL |
|                                 |                          |                            | ER        | OnoMykERb   | P57782              | UniProtKB/TrEMBL |
|                                 |                          |                            | GR        | OnoMykGR    | P49843              | UniProtKB/TrEMBL |
|                                 |                          |                            | GR        | OnoMykGR2   | Q6RQ03              | UniProtKB/TrEMBL |
|                                 |                          |                            | MR        | OnoMykMR    | Q5WP02              | UniProtKB/TrEMBL |
| <i>Oryzostoma barbatula</i>     | cyprinid fish            | Vertebrata, Teleostei      | ER        | OryzBarERb2 | P22D36              | UniProtKB/TrEMBL |
| <i>Oreochromis aureus</i>       | Israeli tilapia          | Vertebrata, Teleostei      | ER        | OreAurERa   | Q60240              | UniProtKB/TrEMBL |
| <i>Oreochromis niloticus</i>    | Nile tilapia             | Vertebrata, Teleostei      | ER        | OreNilERa   | Q8UWB8              | UniProtKB/TrEMBL |
|                                 |                          |                            | AR        | OreNilAR    | Q8UBW7              | UniProtKB/TrEMBL |
|                                 |                          |                            | ER        | OreNilERa   | Q9Y183              | UniProtKB/TrEMBL |
|                                 |                          |                            | ER        | OreNilERb   | Q73J34              | UniProtKB/TrEMBL |
| <i>Oryctolagus cuniculus</i>    | rabbit                   | Vertebrata, Glires         | AR        | OrycUnAR    | P49699              | UniProtKB/TrEMBL |
|                                 |                          |                            | GR        | OrycUnGR    | P59687              | UniProtKB/TrEMBL |
|                                 |                          |                            | PR        | OrycUnPR    | P06186              | UniProtKB/TrEMBL |
| <i>Oryzias latipes</i>          | Japanese ricefish        | Vertebrata, Teleostei      | AR        | OryLatAR    | Q76L05              | UniProtKB/TrEMBL |
|                                 |                          |                            | ER        | OryLatERa   | M50241              | UniProtKB/TrEMBL |
|                                 |                          |                            | ER        | OryLatERb   | Q8UW75              | UniProtKB/TrEMBL |
| <i>Ovis aries</i>               | sheep                    | Vertebrata, Ruminantia     | ER        | OviARa      | Q56113              | UniProtKB/TrEMBL |
|                                 |                          |                            | ER        | OviAERb     | Q27115              | UniProtKB/TrEMBL |
| <i>Pagrus major</i>             | red sea bream            | Vertebrata, Teleostei      | AR        | PagMajAR    | Q93497              | UniProtKB/TrEMBL |
|                                 |                          |                            | ER        | PagMajERa   | Q42132              | UniProtKB/TrEMBL |
| <i>Paralichthys olivaceus</i>   | Japanese flounder        | Vertebrata, Teleostei      | ER        | ParOlIEAR   | Q8QHL0              | UniProtKB/TrEMBL |
|                                 |                          |                            | ER        | ParOlIEERb  | Q930HK9             | UniProtKB/TrEMBL |
|                                 |                          |                            | GR        | ParOlIGR    | Q73B73              | UniProtKB/TrEMBL |
| <i>Petromyzon marinus</i>       | sea lamprey              | Vertebrata, Hyperoartia    | COUP-TFI1 | PetMarCP2   | Q42509              | UniProtKB/TrEMBL |
|                                 |                          |                            | CR        | PetMarCR    | Q902M7              | UniProtKB/TrEMBL |
|                                 |                          |                            | ER        | PetMarER    | Q902M8              | UniProtKB/TrEMBL |
|                                 |                          |                            | PR        | PetMarPR    | Q902M6              | UniProtKB/TrEMBL |
|                                 |                          |                            | RXR2      | PetMarRXR2  | Q90V01              | UniProtKB/TrEMBL |
| <i>Pimephales promelas</i>      | fathead minnow           | Vertebrata, Teleostei      | AR        | PimProAR    | Q19BF5              | UniProtKB/TrEMBL |
|                                 |                          |                            | ER        | PimProERa   | Q5XKP1              | UniProtKB/TrEMBL |
|                                 |                          |                            | GR        | PimProGR    | Q271U5              | UniProtKB/TrEMBL |
| <i>Platyneris dumilei</i>       | polychaete worm          | Annelida, Polychaeta       | ER        | PlatDumER   | EU482033            | Genbank          |
| <i>Rana caesabiana</i>          | bullfrog                 | Vertebrata, Anura          | AR        | RanCaAR     | Q17144              | UniProtKB/TrEMBL |
| <i>Rana dybowskii</i>           | Korean brown frog        | Vertebrata, Anura          | PR        | RanDybPR    | Q8AV12              | UniProtKB/TrEMBL |
| <i>Rana rugosa</i>              | wrinkled frog            | Vertebrata, Anura          | SF1       | RanRugSF1   | Q9Y195              | UniProtKB/TrEMBL |
| <i>Rattus norvegicus</i>        | rat                      | Vertebrata, Rodentia       | AR        | RatNovAR    | P15207              | UniProtKB/TrEMBL |
|                                 |                          |                            | ER        | RatNovERb   | Q62686              | UniProtKB/TrEMBL |
|                                 |                          |                            | ER        | RatNovERR2  | P11475              | UniProtKB/TrEMBL |
|                                 |                          |                            | GR        | RatNovGR    | P06536              | UniProtKB/TrEMBL |
|                                 |                          |                            | GR        | RatNovMR    | P22199              | UniProtKB/TrEMBL |
|                                 |                          |                            | PR        | RatNovPR    | Q63449              | UniProtKB/TrEMBL |
|                                 |                          |                            | MR        | SalBoIR     | Q13186              | UniProtKB/TrEMBL |
| <i>Saimiri boliviensis</i>      | squirrel monkey          | Vertebrata, Primates       | GR        | SalBoIR     | Q4JM28              | UniProtKB/TrEMBL |
| <i>Salmo salar</i>              | Atlantic salmon          | Vertebrata, Teleostei      | ER        | SalSalERb   | Q6R754              | UniProtKB/TrEMBL |
| <i>Salmo trutta</i>             | brown salmon             | Vertebrata, Teleostei      | GR        | SalTrUGR    | Q51124              | UniProtKB/TrEMBL |
| <i>Serinus canarius</i>         | canary                   | Vertebrata, Aves           | AR        | SerCanAR    | Q91445              | UniProtKB/TrEMBL |
| <i>Sparus aurata</i>            | gilthead sea bream       | Vertebrata, Teleostei      | ER        | SpaAurERa   | Q9PV29              | UniProtKB/TrEMBL |
|                                 |                          |                            | ER        | SpaAurERb   | Q9W6M2              | UniProtKB/TrEMBL |
|                                 |                          |                            | GR        | SpaAurGR    | Q1HKH3              | UniProtKB/TrEMBL |
| <i>Spinibarbus denticulatus</i> | cyprinid fish            | Vertebrata, Teleostei      | ER        | SpDebER     | Q1GCL3              | UniProtKB/TrEMBL |
| <i>Squalus acanthias</i>        | spiny dogfish            | Vertebrata, Elasmobranch   | AR        | SquAacAR    | Q56VU2              | UniProtKB/TrEMBL |
|                                 |                          |                            | ER        | SquAacERb   | Q90Z66              | UniProtKB/TrEMBL |
| <i>Sturnus vulgaris</i>         | European starling        | Vertebrata, Aves           | ER        | StuVulERb   | Q9PVE2              | UniProtKB/TrEMBL |
| <i>Sus scrofa</i>               | pig                      | Vertebrata, Cetartiodactyl | ER        | SusScERa    | Q5GK47              | UniProtKB/TrEMBL |
|                                 |                          |                            | ER        | SusScERb    | Q29404              | UniProtKB/TrEMBL |
|                                 |                          |                            | GR        | SusScERb    | Q9XSW2              | UniProtKB/TrEMBL |
|                                 |                          |                            | GR        | SusScGR     | Q9N1U3              | UniProtKB/TrEMBL |
| <i>Taeniopygia guttata</i>      | zebrafinch               | Vertebrata, Aves           | AR        | TaeGuAR     | Q2VPH8              | UniProtKB/TrEMBL |
|                                 |                          |                            | ER        | TaeGuERa    | Q91250              | UniProtKB/TrEMBL |
|                                 |                          |                            | MR        | TaeGuMR     | Q157N1              | UniProtKB/TrEMBL |
|                                 |                          |                            | SF1       | TaeGuSF1    | Q90XC4              | UniProtKB/TrEMBL |
| <i>Takifugu rubripes</i>        | pufferfish               | Vertebrata, Teleostei      | AR        | TakRuAR     | NEWSINRUP0000156318 | Ensemble         |
| <i>Tetradon nigroviridis</i>    | green-spotted pufferfish | Vertebrata, Teleostei      | ER        | TeNigERa    | Q45866              | UniProtKB/TrEMBL |
| <i>Thais clavigera</i>          | whelk                    | Mollusca, Gastropoda       | ER        | ThaClAEr    | Q86B27              | UniProtKB/TrEMBL |
| <i>Trichoplax adhaerens</i>     | planozoan                | Placozoa                   | ERR       | TriAdhERR   | Tradi116711         | JGI              |
| <i>Tupaia glis</i>              | common tree shrew        | Vertebrata, Scandentia     | GR        | TupGlIGR    | Q95267              | UniProtKB/TrEMBL |
|                                 |                          |                            | MR        | TupGlIMR    | Q92131              | UniProtKB/TrEMBL |
| <i>Xenopus laevis</i>           | African clawed toad      | Vertebrata, Anura          | AR        | XenLaAR     | P17048              | UniProtKB/TrEMBL |
|                                 |                          |                            | CP1       | XenLaCP1    | Q9W745              | UniProtKB/TrEMBL |
|                                 |                          |                            | ER        | XenLaERa    | P81559              | UniProtKB/TrEMBL |
|                                 |                          |                            | ERR       | XenLaERR    | Q6AX97              | UniProtKB/TrEMBL |
|                                 |                          |                            | GR        | XenLaGR     | P49844              | UniProtKB/TrEMBL |
|                                 |                          |                            | MR        | XenLaMR     | Q66129              | UniProtKB/TrEMBL |
|                                 |                          |                            | PR        | XenLaPR     | Q9D0U9              | UniProtKB/TrEMBL |
|                                 |                          |                            | RXR       | XenLaERXRa  | P51128              | UniProtKB/TrEMBL |
|                                 |                          |                            | RXR       | XenLaERXb   | Q91840              | UniProtKB/TrEMBL |
|                                 |                          |                            | RXR       | XenLaERXg   | P51129              | UniProtKB/TrEMBL |
| <i>Xenopus tropicalis</i>       | clawed toad              | Vertebrata, Anura          | AR        | XenTroAR    | Q9W4G8              | UniProtKB/TrEMBL |
|                                 |                          |                            | ER        | XenTroERb   | Q9W5C8              | UniProtKB/TrEMBL |
| <i>Zoarces viviparus</i>        | Elpout                   | Vertebrata, Teleostei      | ER        | ZoaVivERa   | Q800C2              | UniProtKB/TrEMBL |
