# Supplementary material for: Evolution of Minimal Specificity and Promiscuity in Steroid Hormone Receptors
Source: PLoS Genet. 2012 Nov 15;8(11):e1003072. doi: 10.1371/journal.pgen.1003072 (PMC3499368; doi:10.1371/journal.pgen.1003072)
Supplement: Table S4 — Pubmed compound identifier (CID) numbers for cholesterol and the synthetic and natural steroid hormones tested in this study. (PDF) [file pgen.1003072.s017.pdf]

Table S4. Pubmed compound identifier (CID) numbers for cholesterol and the synthetic and natural steroid hormones tested in this study .  
For the two substances that a CID number was not available, the Steraloids catalogue number and name are provided.

| Number in text | Steroid Name in Text                        | Abbreviation | Pubmed Compound Identifier Number (CID) | Steraloids Catalogue # | Steraloids name                            |
|----------------|---------------------------------------------|--------------|-----------------------------------------|------------------------|--------------------------------------------|
| 1              | 11-Deoxycorticosterone                      | 11-DOC       | 6166                                    |                        |                                            |
| 2              | 11-Deoxycortisol                            |              | 440707                                  |                        |                                            |
| 3              | Corticosterone                              |              | 5753                                    |                        |                                            |
| 4              | Cortisol                                    |              | 5754                                    |                        |                                            |
| 5              | Aldosterone                                 |              | 5839                                    |                        |                                            |
| 6              | Progesterone                                |              | 5994                                    |                        |                                            |
| 7              | 17-Hydroxyprogesterone                      |              | 6238                                    |                        |                                            |
| 8              | 19-Norprogesterone                          |              | 228864                                  |                        |                                            |
| 9              | 4-Pregnenolone                              |              | -                                       | Q3540-000              | 4-PREGNEN-3 $\beta$ -OL-20-ONE             |
| 10             | 5-Pregnenolone                              |              | 8955                                    |                        |                                            |
| 11             | 20 $\alpha$ Hydroxyprogesterone             |              | 440204                                  |                        |                                            |
| 12             | 20 $\beta$ Hydroxyprogesterone              |              | 92747                                   |                        |                                            |
| 13             | Testosterone                                |              | 6013                                    |                        |                                            |
| 14             | Dihydrotestosterone                         | DHT          | 10635                                   |                        |                                            |
| 15             | 4-Androstenediol                            |              | 136297                                  |                        |                                            |
| 16             | 5-Androstenediol                            |              | 10634                                   |                        |                                            |
| 17             | 19-Nortestosterone                          |              | 9904                                    |                        |                                            |
| 18             | Bolandioli                                  |              | 16141                                   |                        |                                            |
| 19             | Estradiol                                   |              | 5757                                    |                        |                                            |
| 20             | Estrone                                     |              | 5870                                    |                        |                                            |
| 21             | Estriol                                     |              | 5756                                    |                        |                                            |
| 22             | 4-Androstenedione                           |              | 6128                                    |                        |                                            |
| 23             | 19-nor-1, 3, 5(10)-pregnatriene-3-ol-20-one | NPT          | -                                       | N0600-000              | 19-NOR-1, 3, 5(10)-PREGNATRIEN-3-OL-20-ONE |
| 0              | Cholesterol                                 |              | 5997                                    |                        |                                            |
|                | Diethylstilbestrol                          | DES          | 448537                                  |                        |                                            |
|                | Genistein                                   |              | 5280961                                 |                        |                                            |
|                | 4-Hydroxytamoxifen                          |              | 449459                                  |                        |                                            |
|                | ICI 182,780                                 | fulvestrant  | 104741                                  |                        |                                            |
