# Supplementary material for: Evolution of Minimal Specificity and Promiscuity in Steroid Hormone Receptors
Source: PLoS Genet. 2012 Nov 15;8(11):e1003072. doi: 10.1371/journal.pgen.1003072 (PMC3499368; doi:10.1371/journal.pgen.1003072)
Supplement: Table S5 — Fold preferences of AncSR1 and AncSR2 for the hormone pairs indicated in Figure 2. (PDF) [file pgen.1003072.s018.pdf]

Table S5. Fold preferences of AncSR1 and AnSR2 for the hormone pairs indicated in Fig. 2.

|          |                                                       | Hormone 1 | EC <sub>50</sub> (nM) | Hormone 2 | EC <sub>50</sub> (nM) | Ratio H1/H2 | Ratio H2/H1 |
|----------|-------------------------------------------------------|-----------|-----------------------|-----------|-----------------------|-------------|-------------|
| <b>b</b> | preference for aromatized A-ring (H1/H2)              | 18        | 1765                  | 19        | 49                    | 36.02       | 0.03        |
|          |                                                       | 22        | >10 000               | 20        | 69                    | 144.93      | 0.01        |
|          |                                                       | 8         | >10 000               | 23        | 179                   | 55.87       | 0.02        |
| <b>c</b> | preference for non-aromatized A-ring (H1/H2)          | 23        | 182                   | 8         | 1.6                   | 113.75      | 0.01        |
|          |                                                       | 19        | >10 000               | 18        | 20                    | 500.00      | 0.00        |
| <b>d</b> | preference for 17-acetyl vs. 17-hydroxy group (H1/H2) | 13        | 116                   | 6         | 5.5                   | 21.09       | 0.05        |
|          |                                                       | 17        | 69                    | 8         | 1.6                   | 43.13       | 0.02        |
|          |                                                       | 15        | 262                   | 9         | 2.2                   | 119.09      | 0.01        |
|          |                                                       | 16        | 83                    | 10        | 3.8                   | 21.84       | 0.05        |
|          |                                                       | 19        | >10 000               | 23        | 182                   | 54.95       | 0.02        |
| <b>e</b> | preference for 3-hydroxy vs. 3-keto group (H2/H1)     | 18        | 20                    | 17        | 69                    | 0.29        | 3.45        |
|          |                                                       | 9         | 2.2                   | 6         | 5.5                   | 0.40        | 2.50        |
|          |                                                       | 15        | 262                   | 13        | 116                   | 2.26        | 0.44        |
| <b>f</b> | preference for 21-OH group vs. H group (H2/H1)        | 1         | 0.42                  | 6         | 5.5                   | 0.08        | 13.10       |
|          |                                                       | 2         | 1.5                   | 7         | 19                    | 0.08        | 12.67       |
| <b>g</b> | preference for 11-OH vs. H group (H1/H2)              | 1         | 0.42                  | 3         | 0.31                  | 1.35        | 0.74        |
|          |                                                       | 2         | 1.5                   | 4         | 9.8                   | 0.15        | 6.53        |
| <b>h</b> | preference for 17a-H group vs. -OH group (H2/H1)      | 3         | 0.31                  | 4         | 9.8                   | 0.03        | 31.61       |
|          |                                                       | 6         | 5.5                   | 7         | 19                    | 0.29        | 3.45        |
| <b>i</b> | preference for 19-H vs. 19-methyl group (H2/H1)       | 8         | 1.6                   | 6         | 5.5                   | 0.29        | 3.44        |
|          |                                                       | 17        | 69                    | 13        | 116                   | 0.59        | 1.68        |
|          |                                                       | 18        | 20                    | 15        | 262                   | 0.08        | 13.10       |

- 1 11-deoxycorticosterone
- 2 11-deoxycortisol
- 3 corticosterone
- 4 cortisol
- 5 aldosterone
- 6 progesterone
- 7 17a-hydroxyprogesterone
- 8 19-norprogesterone
- 9 4-pregnenolone
- 10 5-pregnenolone
- 11 20a hydroxyprogesterone
- 12 20b hydroxyprogesterone
- 13 testosterone
- 14 dihydrotestosterone
- 15 4-androstenediol
- 16 5-androstenediol
- 17 19-nortestosterone
- 18 bolandiol
- 19 estradiol
- 20 estrone
- 21 estriol
- 22 4-androstenedione
- 23 NPT
