# Supplementary material for: Evolution of Minimal Specificity and Promiscuity in Steroid Hormone Receptors
Source: PLoS Genet. 2012 Nov 15;8(11):e1003072. doi: 10.1371/journal.pgen.1003072 (PMC3499368; doi:10.1371/journal.pgen.1003072)
Supplement: Table S6 — Data collection and refinement statistics for the AncSR2 crystal structure in complex with 11-DOC and progesterone. (PDF) [file pgen.1003072.s019.pdf]

Table S6. Data collection and refinement statistics for the AncSR2 LBD crystal structure in complex with 11-deoxycorticosterone (11-DOC) and progesterone.

| Data Collection and Refinement Statistics                           |                                               |                       |
|---------------------------------------------------------------------|-----------------------------------------------|-----------------------|
|                                                                     | AncSR2-Progesterone                           | AncSR2-11-DOC         |
| Resolution (Å)                                                      | 2.75(2.85-2.75)                               | 2.82 (2.92-2.82)      |
| Space Group                                                         | P2 <sub>1</sub> 2 <sub>1</sub> 2 <sub>1</sub> | C222 <sub>1</sub>     |
| Unit Cell Dimensions                                                | 53.47, 112.11, 132.85                         | 52.80, 111.62, 130.77 |
| a, b, c (Å)                                                         | 90, 90, 90                                    | 90, 90, 90            |
| α, β, γ (°)                                                         |                                               |                       |
| No. of Reflections                                                  | 20584                                         | 9198                  |
| R <sup>a</sup> <sub>sym</sub>                                       | 8.9% (44.3%)                                  | 7.1% (34.5%)          |
| Completeness                                                        | 99.4% (96.1%)                                 | 92.6% (70.0%)         |
| Ave. Redundancy                                                     | 6.8 (5.2)                                     | 3.9 (3.1)             |
| I/σ                                                                 | 25.1 (3.5)                                    | 19.4 (3.1)            |
| Monomers per asymmetric unit (AU)                                   | 2                                             | 1                     |
| No. of protein atoms/AU                                             | 4228                                          | 2069                  |
| No. of ligand atoms/AU                                              | 2                                             | 2                     |
| No. of waters/AU                                                    | 65                                            | 31                    |
| R <sup>b</sup> <sub>working</sub> (R <sup>c</sup> <sub>free</sub> ) | 23.3 (29.1)                                   | 23.1 (30.6)           |
| Ave. B-factors (Å <sup>2</sup> )                                    |                                               |                       |
| Protein                                                             | 63.06                                         | 72.12                 |
| Ligand                                                              | 55.63                                         | 70.04                 |
| Water                                                               | 63.21                                         | 68.44                 |
| r.m.s. deviations                                                   |                                               |                       |
| Bond lengths, Å                                                     | 0.014                                         | 0.009                 |
| Bond angles, °                                                      | 1.792                                         | 1.298                 |

<sup>a</sup> R<sub>sym</sub> = Σ|I - <I>| / Σ|I|, where I is the observed intensity and <I> is the average intensity of several symmetry-related observations.

<sup>b</sup> R<sub>working</sub> = Σ||Fo| - |Fc|| / Σ|Fo|, where Fo and Fc are the observed and calculated structure factors, respectively.

<sup>c</sup> R<sub>free</sub> = Σ||Fo| - |Fc|| / Σ|Fo| for 7% of the data not used at any stage of the structural refinement.

\*Highest resolution shell is shown in parentheses.
