# Supplementary material for: Evolution of Minimal Specificity and Promiscuity in Steroid Hormone Receptors
Source: PLoS Genet. 2012 Nov 15;8(11):e1003072. doi: 10.1371/journal.pgen.1003072 (PMC3499368; doi:10.1371/journal.pgen.1003072)
Supplement: Table S8 — Comparison of the sequence of AncSR2 as reconstructed on the ML phylogeny and gene duplication phylogeny. (PDF) [file pgen.1003072.s021.pdf]

Table S8. Comparison of the sequence of AncSR2 as reconstructed on the ML phylogeny and gene duplication phylogeny (see Figs. S10, S12). Residues in the ligand binding pocket are indicated in red text. Differences between the two ancestral reconstructions are highlighted in orange.

|    | AncSR2 as reconstructed on 184-taxa ML tree |      |            |      | AncSR2 as reconstructed on 184-taxa gene duplication tree |      |            |      |
|----|---------------------------------------------|------|------------|------|-----------------------------------------------------------|------|------------|------|
|    | Amino acid                                  | PP1  | Alt. State | PP2  | Amino acid                                                | PP1  | Alt. State | PP2  |
| 1  | P                                           | 1.00 |            |      | P                                                         | 1.00 |            |      |
| 2  | S                                           | 0.81 | T          | 0.19 | S                                                         | 0.64 | T          | 0.34 |
| 3  | L                                           | 0.91 | I          | 0.04 | L                                                         | 0.98 | I          | 0.01 |
| 4  | I                                           | 0.78 | V          | 0.21 | I                                                         | 0.81 | V          | 0.19 |
| 5  | S                                           | 0.94 | T          | 0.05 | S                                                         | 0.98 | T          | 0.01 |
| 6  | I                                           | 0.94 | V          | 0.03 | I                                                         | 0.99 | V          | 0.01 |
| 7  | L                                           | 1.00 |            |      | L                                                         | 1.00 |            |      |
| 8  | Q                                           | 0.50 | E          | 0.49 | Q                                                         | 0.99 | E          | 0.01 |
| 9  | A                                           | 0.56 | V          | 0.19 | A                                                         | 0.54 | V          | 0.21 |
| 10 | I                                           | 1.00 |            |      | I                                                         | 1.00 |            |      |
| 11 | E                                           | 1.00 |            |      | E                                                         | 1.00 |            |      |
| 12 | P                                           | 1.00 |            |      | P                                                         | 1.00 |            |      |
| 13 | E                                           | 0.99 | D          | 0.01 | E                                                         | 1.00 | D          | 0.01 |
| 14 | V                                           | 0.96 | I          | 0.04 | V                                                         | 0.98 | I          | 0.02 |
| 15 | V                                           | 0.98 | I          | 0.02 | V                                                         | 0.99 | I          | 0.01 |
| 16 | Y                                           | 1.00 | F          | 0.00 | Y                                                         | 1.00 | F          | 0.00 |
| 17 | A                                           | 1.00 |            |      | A                                                         | 1.00 |            |      |
| 18 | G                                           | 1.00 |            |      | G                                                         | 1.00 |            |      |
| 19 | Y                                           | 1.00 | F          | 0.00 | Y                                                         | 0.99 | F          | 0.01 |
| 20 | D                                           | 1.00 |            |      | D                                                         | 1.00 |            |      |
| 21 | N                                           | 0.81 | S          | 0.19 | N                                                         | 1.00 | S          | 0.00 |
| 22 | T                                           | 0.61 | S          | 0.38 | T                                                         | 0.71 | S          | 0.29 |
| 23 | Q                                           | 0.97 | R          | 0.02 | Q                                                         | 0.96 | R          | 0.03 |
| 24 | P                                           | 1.00 |            |      | P                                                         | 1.00 |            |      |
| 25 | D                                           | 0.95 | E          | 0.04 | D                                                         | 0.90 | E          | 0.08 |
| 26 | T                                           | 1.00 |            |      | T                                                         | 1.00 |            |      |
| 27 | T                                           | 0.99 | S          | 0.01 | T                                                         | 0.99 | S          | 0.01 |
| 28 | N                                           | 0.97 | S          | 0.02 | N                                                         | 0.96 | S          | 0.03 |
| 29 | Y                                           | 0.80 | H          | 0.19 | Y                                                         | 0.99 | H          | 0.01 |
| 30 | L                                           | 1.00 | M          | 0.00 | L                                                         | 1.00 | M          | 0.00 |
| 31 | L                                           | 1.00 |            |      | L                                                         | 1.00 |            |      |
| 32 | S                                           | 0.90 | T          | 0.10 | S                                                         | 0.86 | T          | 0.14 |
| 33 | S                                           | 1.00 | T          | 0.00 | S                                                         | 1.00 |            |      |
| 34 | L                                           | 1.00 |            |      | L                                                         | 1.00 |            |      |
| 35 | N                                           | 1.00 |            |      | N                                                         | 1.00 |            |      |
| 36 | R                                           | 0.99 | K          | 0.01 | R                                                         | 1.00 | K          | 0.00 |
| 37 | L                                           | 1.00 |            |      | L                                                         | 1.00 |            |      |
| 38 | A                                           | 0.87 | C          | 0.06 | C                                                         | 1.00 | A          | 0.00 |
| 39 | E                                           | 0.85 | G          | 0.13 | E                                                         | 0.99 | D          | 0.01 |
| 40 | K                                           | 0.61 | R          | 0.40 | K                                                         | 0.62 | R          | 0.38 |
| 41 | Q                                           | 1.00 |            |      | Q                                                         | 1.00 |            |      |
| 42 | L                                           | 0.77 | M          | 0.23 | L                                                         | 1.00 | M          | 0.00 |
| 43 | V                                           | 1.00 | I          | 0.00 | V                                                         | 1.00 |            |      |
| 44 | S                                           | 0.92 | R          | 0.05 | S                                                         | 0.94 | R          | 0.03 |
| 45 | V                                           | 1.00 | I          | 0.00 | V                                                         | 0.99 | I          | 0.01 |
| 46 | V                                           | 1.00 |            |      | V                                                         | 1.00 |            |      |
| 47 | K                                           | 1.00 | R          | 0.00 | K                                                         | 1.00 |            |      |
| 48 | W                                           | 1.00 |            |      | W                                                         | 1.00 |            |      |
| 49 | A                                           | 1.00 |            |      | A                                                         | 1.00 |            |      |
| 50 | K                                           | 1.00 |            |      | K                                                         | 1.00 |            |      |
| 51 | A                                           | 0.88 | V          | 0.08 | A                                                         | 0.90 | S          | 0.06 |
| 52 | L                                           | 1.00 | M          | 0.00 | L                                                         | 1.00 | M          | 0.00 |
| 53 | P                                           | 1.00 |            |      | P                                                         | 1.00 |            |      |
| 54 | G                                           | 1.00 |            |      | G                                                         | 1.00 |            |      |
| 55 | F                                           | 1.00 |            |      | F                                                         | 1.00 |            |      |
| 56 | R                                           | 1.00 | K          | 0.00 | R                                                         | 1.00 | K          | 0.00 |
| 57 | N                                           | 0.99 | S          | 0.01 | N                                                         | 1.00 | S          | 0.00 |
| 58 | L                                           | 1.00 |            |      | L                                                         | 1.00 |            |      |
| 59 | H                                           | 0.98 | P          | 0.01 | H                                                         | 1.00 |            |      |
| 60 | L                                           | 0.79 | I          | 0.21 | I                                                         | 1.00 | L          | 0.00 |
| 61 | D                                           | 0.99 | E          | 0.01 | D                                                         | 1.00 |            |      |
| 62 | D                                           | 1.00 |            |      | D                                                         | 1.00 |            |      |
| 63 | Q                                           | 1.00 |            |      | Q                                                         | 1.00 |            |      |
| 64 | M                                           | 1.00 |            |      | M                                                         | 1.00 |            |      |
| 65 | T                                           | 1.00 |            |      | T                                                         | 1.00 |            |      |
| 66 | L                                           | 1.00 |            |      | L                                                         | 1.00 |            |      |
| 67 | I                                           | 0.52 | L          | 0.48 | I                                                         | 1.00 |            |      |
| 68 | Q                                           | 1.00 |            |      | Q                                                         | 1.00 |            |      |
| 69 | Y                                           | 1.00 |            |      | Y                                                         | 1.00 |            |      |
| 70 | S                                           | 1.00 |            |      | S                                                         | 1.00 |            |      |
| 71 | W                                           | 1.00 |            |      | W                                                         | 1.00 |            |      |
| 72 | M                                           | 1.00 |            |      | M                                                         | 1.00 |            |      |
| 73 | G                                           | 0.75 | S          | 0.14 | G                                                         | 1.00 |            |      |
| 74 | L                                           | 1.00 |            |      | L                                                         | 1.00 |            |      |
| 75 | M                                           | 1.00 |            |      | M                                                         | 1.00 |            |      |
| 76 | A                                           | 0.88 | S          | 0.05 | A                                                         | 0.94 | V          | 0.03 |
| 77 | F                                           | 1.00 |            |      | F                                                         | 1.00 |            |      |
| 78 | A                                           | 0.84 | S          | 0.15 | A                                                         | 1.00 | S          | 0.00 |
| 79 | L                                           | 0.59 | M          | 0.41 | M                                                         | 1.00 | L          | 0.00 |
| 80 | G                                           | 0.92 | S          | 0.07 | G                                                         | 0.99 | S          | 0.01 |
| 81 | W                                           | 1.00 |            |      | W                                                         | 1.00 |            |      |
| 82 | R                                           | 1.00 |            |      | R                                                         | 1.00 |            |      |
| 83 | S                                           | 1.00 |            |      | S                                                         | 1.00 |            |      |

|     | AncSR2 as reconstructed on 184-taxa ML tree |      |            |      | AncSR2 as reconstructed on 184-taxa gene duplication tree |      |            |      |
|-----|---------------------------------------------|------|------------|------|-----------------------------------------------------------|------|------------|------|
|     | Amino acid                                  | PP   | Alt. State | PP   | Amino acid                                                | PP   | Alt. State | PP   |
| 84  | Y                                           | 1.00 |            |      | Y                                                         | 1.00 |            |      |
| 85  | K                                           | 0.99 | R          | 0.01 | K                                                         | 0.99 | R          | 0.00 |
| 86  | H                                           | 1.00 |            |      | H                                                         | 1.00 |            |      |
| 87  | T                                           | 0.82 | A          | 0.07 | T                                                         | 0.86 | V          | 0.07 |
| 88  | N                                           | 1.00 |            |      | N                                                         | 1.00 |            |      |
| 89  | G                                           | 1.00 | S          | 0.00 | G                                                         | 1.00 | S          | 0.00 |
| 90  | Q                                           | 0.76 | K          | 0.13 | Q                                                         | 0.80 | K          | 0.18 |
| 91  | M                                           | 1.00 | L          | 0.00 | M                                                         | 1.00 | L          | 0.00 |
| 92  | L                                           | 1.00 |            |      | L                                                         | 1.00 |            |      |
| 93  | Y                                           | 1.00 | F          | 0.00 | Y                                                         | 1.00 |            |      |
| 94  | F                                           | 1.00 |            |      | F                                                         | 1.00 |            |      |
| 95  | A                                           | 1.00 |            |      | A                                                         | 1.00 |            |      |
| 96  | P                                           | 1.00 |            |      | P                                                         | 1.00 |            |      |
| 97  | D                                           | 1.00 |            |      | D                                                         | 1.00 |            |      |
| 98  | L                                           | 1.00 |            |      | L                                                         | 1.00 |            |      |
| 99  | I                                           | 0.98 | V          | 0.02 | I                                                         | 0.99 | V          | 0.01 |
| 100 | F                                           | 1.00 |            |      | F                                                         | 1.00 |            |      |
| 101 | N                                           | 1.00 |            |      | N                                                         | 1.00 |            |      |
| 102 | E                                           | 1.00 |            |      | E                                                         | 1.00 |            |      |
| 103 | Q                                           | 0.63 | E          | 0.36 | Q                                                         | 0.98 | E          | 0.02 |
| 104 | R                                           | 1.00 |            |      | R                                                         | 1.00 |            |      |
| 105 | M                                           | 1.00 |            |      | M                                                         | 1.00 |            |      |
| 106 | Q                                           | 0.99 | H          | 0.00 | Q                                                         | 1.00 | K          | 0.00 |
| 107 | Q                                           | 1.00 |            |      | Q                                                         | 1.00 | K          | 0.00 |
| 108 | S                                           | 1.00 |            |      | S                                                         | 1.00 |            |      |
| 109 | A                                           | 1.00 | T          | 0.00 | A                                                         | 1.00 |            |      |
| 110 | M                                           | 1.00 |            |      | M                                                         | 1.00 |            |      |
| 111 | Y                                           | 1.00 | F          | 0.00 | Y                                                         | 1.00 |            |      |
| 112 | D                                           | 0.73 | E          | 0.27 | D                                                         | 0.75 | E          | 0.25 |
| 113 | L                                           | 1.00 |            |      | L                                                         | 1.00 |            |      |
| 114 | C                                           | 1.00 |            |      | C                                                         | 1.00 |            |      |
| 115 | Q                                           | 0.48 | L          | 0.18 | L                                                         | 0.46 | M          | 0.22 |
| 116 | G                                           | 1.00 |            |      | G                                                         | 1.00 |            |      |
| 117 | M                                           | 1.00 |            |      | M                                                         | 1.00 |            |      |
| 118 | Q                                           | 0.48 | R          | 0.48 | R                                                         | 0.77 | Q          | 0.22 |
| 119 | Q                                           | 0.99 | K          | 0.01 | Q                                                         | 1.00 | N          | 0.00 |
| 120 | I                                           | 1.00 | V          | 0.00 | I                                                         | 1.00 | V          | 0.01 |
| 121 | S                                           | 0.99 | A          | 0.01 | S                                                         | 1.00 |            |      |
| 122 | Q                                           | 0.47 | L          | 0.11 | Q                                                         | 0.68 | E          | 0.17 |
| 123 | E                                           | 1.00 | D          | 0.00 | E                                                         | 1.00 |            |      |
| 124 | F                                           | 1.00 |            |      | F                                                         | 1.00 |            |      |
| 125 | V                                           | 0.87 | I          | 0.07 | V                                                         | 0.81 | I          | 0.10 |
| 126 | R                                           | 0.98 | K          | 0.02 | R                                                         | 0.98 | K          | 0.02 |
| 127 | L                                           | 1.00 |            |      | L                                                         | 1.00 | M          | 0.00 |
| 128 | Q                                           | 1.00 |            |      | Q                                                         | 1.00 |            |      |
| 129 | V                                           | 0.97 | L          | 0.03 | V                                                         | 1.00 | I          | 0.00 |
| 130 | T                                           | 0.98 | S          | 0.02 | T                                                         | 0.98 | S          | 0.02 |
| 131 | Q                                           | 0.53 | H          | 0.28 | Q                                                         | 0.85 | H          | 0.10 |
| 132 | E                                           | 1.00 | D          | 0.01 | E                                                         | 0.99 | D          | 0.01 |
| 133 | E                                           | 1.00 |            |      | E                                                         | 1.00 |            |      |
| 134 | F                                           | 0.99 | Y          | 0.01 | F                                                         | 1.00 |            |      |
| 135 | L                                           | 1.00 |            |      | L                                                         | 1.00 |            |      |
| 136 | C                                           | 1.00 |            |      | C                                                         | 1.00 |            |      |
| 137 | M                                           | 1.00 |            |      | M                                                         | 1.00 |            |      |
| 138 | K                                           | 1.00 |            |      | K                                                         | 1.00 |            |      |
| 139 | A                                           | 0.87 | V          | 0.13 | A                                                         | 1.00 |            |      |
| 140 | L                                           | 0.98 | I          | 0.02 | L                                                         | 0.96 | I          | 0.04 |
| 141 | L                                           | 1.00 |            |      | L                                                         | 1.00 |            |      |
| 142 | L                                           | 1.00 |            |      | L                                                         | 1.00 |            |      |
| 143 | L                                           | 1.00 |            |      | L                                                         | 1.00 |            |      |
| 144 | S                                           | 0.99 | N          | 0.01 | S                                                         | 0.98 | N          | 0.02 |
| 145 | T                                           | 1.00 |            |      | T                                                         | 1.00 |            |      |
| 146 | V                                           | 0.67 | I          | 0.33 | V                                                         | 0.59 | I          | 0.41 |
| 147 | P                                           | 1.00 |            |      | P                                                         | 1.00 |            |      |
| 148 | K                                           | 0.61 | Q          | 0.34 | Q                                                         | 0.72 | K          | 0.25 |
| 149 | E                                           | 0.54 | D          | 0.46 | E                                                         | 0.98 | D          | 0.02 |
| 150 | G                                           | 1.00 |            |      | G                                                         | 1.00 |            |      |
| 151 | L                                           | 1.00 |            |      | L                                                         | 1.00 |            |      |
| 152 | K                                           | 1.00 | R          | 0.00 | K                                                         | 1.00 |            |      |
| 153 | S                                           | 1.00 | T          | 0.00 | S                                                         | 1.00 | T          | 0.00 |
| 154 | Q                                           | 1.00 | H          | 0.00 | Q                                                         | 1.00 |            |      |
| 155 | A                                           | 0.83 | T          | 0.13 | A                                                         | 0.61 | T          | 0.31 |
| 156 | S                                           | 0.34 | Y          | 0.17 | S                                                         | 0.33 | Y          | 0.32 |
| 157 | F                                           | 1.00 |            |      | F                                                         | 1.00 |            |      |
| 158 | D                                           | 0.95 | E          | 0.05 | D                                                         | 0.93 | E          | 0.07 |
| 159 | E                                           | 1.00 | D          | 0.00 | E                                                         | 1.00 | D          | 0.00 |
| 160 | M                                           | 0.99 | I          | 0.01 | M                                                         | 1.00 |            |      |
| 161 | R                                           | 1.00 |            |      | R                                                         | 1.00 |            |      |
| 162 | M                                           | 1.00 | I          | 0.00 | M                                                         | 1.00 | I          | 0.00 |
| 163 | N                                           | 0.98 | S          | 0.02 | N                                                         | 0.98 | S          | 0.02 |
| 164 | Y                                           | 1.00 |            |      | Y                                                         | 1.00 |            |      |
| 165 | I                                           | 1.00 |            |      | I                                                         | 1.00 |            |      |
| 166 | K                                           | 0.68 | R          | 0.32 | R                                                         | 0.98 | K          | 0.02 |

|     | AncSR2 as reconstructed on 184-taxa ML tree |      |            |      | AncSR2 as reconstructed on 184-taxa gene duplication tree |      |            |      |
|-----|---------------------------------------------|------|------------|------|-----------------------------------------------------------|------|------------|------|
|     | Amino acid                                  | PP   | Alt. State | PP   | Amino acid                                                | PP   | Alt. State | PP   |
| 167 | E                                           | 1.00 |            |      | E                                                         | 1.00 |            |      |
| 168 | L                                           | 1.00 |            |      | L                                                         | 1.00 |            |      |
| 169 | N                                           | 0.43 | R          | 0.25 | N                                                         | 0.95 | S          | 0.03 |
| 170 | R                                           | 0.66 | K          | 0.34 | R                                                         | 0.80 | K          | 0.20 |
| 171 | A                                           | 0.68 | V          | 0.31 | A                                                         | 0.75 | V          | 0.24 |
| 172 | I                                           | 0.94 | V          | 0.06 | I                                                         | 0.94 | V          | 0.06 |
| 173 | A                                           | 0.68 | V          | 0.20 | A                                                         | 0.73 | V          | 0.11 |
| 174 | K                                           | 0.55 | R          | 0.34 | R                                                         | 0.47 | K          | 0.32 |
| 175 | K                                           | 0.55 | R          | 0.24 | K                                                         | 0.51 | Q          | 0.24 |
| 176 | E                                           | 0.98 | D          | 0.02 | E                                                         | 0.97 | D          | 0.03 |
| 177 | N                                           | 0.85 | K          | 0.08 | N                                                         | 0.78 | K          | 0.19 |
| 178 | N                                           | 1.00 | S          | 0.00 | N                                                         | 1.00 | S          | 0.00 |
| 179 | S                                           | 0.53 | T          | 0.24 | A                                                         | 0.34 | S          | 0.28 |
| 180 | A                                           | 0.47 | G          | 0.24 | A                                                         | 0.74 | V          | 0.16 |
| 181 | Q                                           | 0.99 | E          | 0.01 | Q                                                         | 0.98 | E          | 0.02 |
| 182 | N                                           | 0.56 | S          | 0.41 | S                                                         | 0.80 | N          | 0.15 |
| 183 | W                                           | 1.00 |            |      | W                                                         | 1.00 |            |      |
| 184 | Q                                           | 1.00 | H          | 0.00 | Q                                                         | 1.00 |            |      |
| 185 | R                                           | 1.00 |            |      | R                                                         | 1.00 |            |      |
| 186 | F                                           | 1.00 |            |      | F                                                         | 1.00 |            |      |
| 187 | Y                                           | 1.00 |            |      | Y                                                         | 1.00 |            |      |
| 188 | Q                                           | 1.00 |            |      | Q                                                         | 1.00 |            |      |
| 189 | L                                           | 1.00 |            |      | L                                                         | 1.00 |            |      |
|     |                                             |      |            |      |                                                           |      |            |      |
